# Supplementary material for: Dermoscopic characteristics of melanoma according to the criteria „ulceration“ and „mitotic rate“ of the AJCC 2009 staging system for melanoma
Source: PLoS One. 2017 Apr 11;12(4):e0174871. doi: 10.1371/journal.pone.0174871 (PMC5388460; doi:10.1371/journal.pone.0174871)
Supplement: S1 File — (XLSX) [file pone.0174871.s001.xlsx]

## Sheet: Tabelle1
																														Face				Acral
					Network			Negative pigmentnetwork	Globules				Streaks				Shiny white streaks	Regression		Blue-white veil	Milky-red areas	Blotches				Vessels			Blue-greay areas	Pseudonetwork	Structures		Asymmetric pigmented follicels	Furrow pattern	Lattice like pattern	Fibrillar patter	Ridge pattern
ID	Sex	Clinical diameter	Ulceration clinically	Ulceration dermoscopically	Not existing	Regular	Irregular		Not existing	Regular	Irregular	Peripheral	Not existing	Regular	Irregular	Peripher		Scar-like	Peppering			Not existing	Regular	Irregular	Peripheral	comma-limke	Dotted	Irregular			Anular	Granular						Diagnosis clinically	Sentinel-lymphnode	Distant metastases	Tumorthickness	Ulcertaion histologically	Mitotic rate	Stage	Stage initially
1	m	1,6cm	0	0	0	1	1	0	1	0	0	0	1	0	0	0	0	0	1	1	0	1	0	0	0	0	0	0	0	0	0	0	0	0	0	0	0	SSM	0	1	< 0,5mm	0	< 1/mm2	IV	IA
2	m	1,0cm	0	0	1	0	0	0	1	0	0	0	1	0	0	0	1	0	0	1	0	0	0	1	0	0	0	0	0	0	1	1	0	0	0	0	0	LM	0	1	1,25mm	0	> 1/mm2	IV	IB
3	m	2,0cm	0	0	0	0	1	0	0	0	1	0	0	0	1	1	1	1	0	1	1	1	0	0	0	0	0	1	0	0	0	0	0	0	0	0	0	SSM	2	1	1,25mm	0	> 1/mm2	IV	IB
4	w	1,0cm	0	0	0	0	1	0	0	0	1	1	0	0	1	1	0	1	0	1	0	0	0	1	0	0	0	0	0	0	0	0	0	0	0	0	0	SSM	2	1	2,1mm	0	0	IV	IIA
5	m	2,5cm	0	0	0	0	1	0	1	0	0	0	1	0	0	0	1	1	0	1	0	0	0	1	0	0	0	0	0	0	0	0	0	0	0	0	0	LM	2	1	3mm	0	0	IV	IIA
6	w	2,6cm	0	0	1	0	0	0	0	0	1	0	1	0	0	0	0	0	0	1	1	0	0	1	0	0	0	0	0	0	0	0	0	0	0	0	0	Mucosa	2	1	2,42mm	0	> 1/mm2	IV	IIB
7	m	2,3cm	1	1	1	0	0	0	0	0	1	0	0	0	0	1	0	0	0	1	0	1	0	0	0	0	0	0	0	0	0	0	0	0	0	0	0	SSM	2	1	50,0mm	1	> 5/mm2	IV	IIC
8	w	1,6cm	1	1	1	0	0	0	1	0	0	0	1	0	0	0	0	0	0	1	1	1	0	0	0	0	0	0	0	0	0	0	0	0	0	0	0	ALM	1	1	2,25mm	1	> 1/mm2	IV	IIC
9	m	1,3cm	1	1	1	0	0	0	1	0	0	0	1	0	0	0	0	0	0	1	1	0	0	1	0	0	0	1	0	0	0	0	0	0	0	0	0	NM	1	1	4,5mm	1	> 1/mm2	IV	IIC
10	w	1,9cm	1	1	1	0	0	0	1	0	0	0	1	0	0	0	1	0	0	1	0	1	0	0	0	0	0	0	1	1	1	1	1	0	0	0	0	LMM	0	1	5,5mm	1	> 1/mm2	IV	IIC
11	w	2,0cm	1	1	1	0	0	0	1	0	0	0	1	0	0	0	1	0	0	1	1	1	0	0	0	0	0	1	0	0	0	0	0	0	0	0	0	NM	2	1	7,5mm	1	> 1/mm2	IV	IIC
12	m	0,9cm	0	0	1	0	0	0	0	0	1	0	1	0	0	0	1	0	0	1	0	1	0	0	0	0	0	0	0	0	0	0	0	0	0	0	0	SSM	2	1	3,6mm	0	0	IV	IIIA
13	w	2,0cm	1	1	0	1	1	0	1	0	0	0	1	0	0	0	1	0	0	1	1	1	0	0	0	0	0	1	0	0	0	0	0	0	0	0	0	SSM	2	1	2,8mm	1	> 1/mm2	IV	IIIA
14	w	5,5cm	1	1	1	0	0	0	1	0	0	0	1	0	0	0	1	0	0	1	1	1	0	0	0	0	0	1	0	0	0	0	0	0	0	0	0	NM	2	1	12mm	1	0	IV	IIIA
15	w	2,5cm	1	1	1	0	0	0	1	0	0	0	1	0	0	0	0	0	0	1	0	1	0	0	0	0	0	1	1	0	0	0	0	0	0	0	0	NM	2	1	> 20,0mm	1	> 1/mm2	IV	IIIB
16	m	2,5cm	1	1	1	0	0	0	1	0	0	0	1	0	0	0	0	0	0	0	1	1	0	0	0	0	0	1	0	0	0	0	0	0	0	0	0	NM	2	1	20mm	1	0	IV	IIIB
17	m	1,5cm	1		1	0	0	0	1	0	0	0	1	0	0	0	0	0	0	0	1	1	0	0	0	0	0	1	0	0	0	0	0	0	0	0	0	NM	2	1	12mm	1	> 1/mm2	IV	IIIB
18	m	3,5cm	1	1	1	0	0	0	1	0	0	0	1	0	0	0	0	0	0	0	1	1	0	0	0	0	0	1	0	0	0	0	0	0	0	0	0	NM	2	1	11mm	1	0	IV	IIIB
19	w	1,5cm	0	0	0	0	1	0	0	0	1	0	1	0	0	0	1	0	0	1	0	0	0	1	0	0	0	0	0	0	0	0	0	0	0	0	0	SSM	denied	1	> 7,0mm	0	> 1/mm2	IV	IIIB
20	m	2,5cm	1	1	1	0	0	0	1	0	0	0	1	0	0	0	1	0	0	0	1	1	0	0	0	0	0	1	0	0	0	0	0	0	0	0	0	ALM	2	1	4,5mm	1	> 1/mm2	IV	IIIB
21	m	1,5cm	1	1	1	0	0	0	1	0	0	0	1	0	0	0	1	0	0	1	1	0	0	1	0	0	0	1	0	0	0	0	0	0	0	0	0	SSM	2	1	5,5mm	1	0	IV	IIIB
22	m	1,5cm	1	1	1	0	0	0	1	0	0	0	1	0	0	0	0	0	0	1	0	0	0	1	0	0	0	0	0	0	1	1	0	0	0	0	0	LMM	2	1	3,5mm	0	> 1/mm2	IV	IV
23	m	3,0cm	1	1	1	0	0	0	0	0	0	1	1	0	0	0	1	0	0	0	0	1	0	0	0	0	0	0	1	0	0	0	0	0	0	0	0	NM	2	1	4,1mm	0	> 1/mm2	IV	IV
24	w	1,5cm	0	0	1	0	0	0	0	0	1	0	1	0	0	0	1	0	0	1	0	0	0	1	0	0	0	0	0	0	0	0	0	0	0	0	0	SSM	0	1	0,75mm	0	< 1/mm2	IV	IV
25	m	5,2cm	1	1	1	0	0	0	1	0	0	0	1	0	0	0	1	0	0	1	0	1	0	0	0	0	0	0	0	0	0	0	0	0	0	0	0	NM	2	1	> 6mm	1	> 1/mm2	IV	IV
26	m	3,0cm	1	1	1	0	0	0	0	0	1	0	1	0	0	0	1	0	0	0	1	0	0	1	0	0	0	1	1	0	0	0	0	0	0	0	0	NM	2	1	2,75mm	1	> 1/mm2	IV	IV
27	m	2,5cm	0	0	0	0	1	0	0	0	1	1	0	0	1	0	1	1	0	1	1	0	0	1	1	0	0	1	0	0	0	0	0	0	0	0	0	SSM	2	1	1,7mm	0	> 1/mm2	IV	IV
28	w	1,5cm	0	0	1	0	0	0	1	0	0	0	1	0	0	0	0	0	0	0	0	1	0	0	0	0	0	1	1	0	0	0	0	0	0	0	0	NM	2	1	4,7mm	0	> 1/mm2	IV	IV
29	m	0,7cm	1	1	1	0	0	0	0	0	1	1	1	0	0	0	0	0	0	0	0	0	0	1	0	0	0	0	0	0	0	0	0	0	0	0	0	SSM	0	1	0,7mm	1	< 1/mm2	IV	IV
30	m	2,0cm	0	0	1	0	0	0	0	0	1	0	1	0	0	0	1	0	0	1	0	1	0	0	0	0	0	0	1	0	0	0	0	0	0	0	0	SSM	0	0	3,7mm	0	1/mm2	IIIC	IIIB
31	w	2,7cm	0	0	0	0	1	0	1	0	0	0	1	0	0	0	0	0	0	1	0	0	0	1	0	0	0	0	0	1	0	0	1	0	0	0	0	LM	2	0	6,0mm	1	0	IIIC	IIIC
32	m	1,8cm	1	1	1	0	0	0	0	0	1	0	1	0	0	0	0	0	0	1	0	1	0	0	0	0	0	1	0	0	0	0	0	0	0	0	0	ALM	2	0	3.65mm	0	0	IIIC	IIIC
33	m	1,5cm	1	1	1	0	0	0	1	0	0	0	1	0	0	0	0	0	0	0	1	1	0	0	0	0	0	1	0	1	0	0	1	0	0	0	0	ALM	2	0	3,0mm	0	0	IIIC	IIIC
34	w	3,8cm	1	1	1	0	0	0	0	0	1	1	0	0	1	1	1	0	0	0	1	1	0	0	0	0	0	1	1	0	0	0	0	0	0	0	0	Mucosa	2	0	9,0mm	1	0	IIIC	IIIC
35	w	4,0cm	1	1	1	0	0	0	1	0	0	0	1	0	0	0	1	0	0	0	1	1	0	0	0	0	0	1	1	0	0	0	0	0	0	0	0	ALM	2	0	15,0mm	1	0	IIIC	IIIC
36	w	3,8cm	0	0	1	0	0	0	1	0	0	0	1	0	0	0	1	1	0	1	0	0	0	1	0	0	0	0	0	0	0	0	0	0	0	0	0	SSM	1	0	0,8mm	0	< 1/mm2	IIIB	IA
37	m	1,3cm	1	1	0	1	1	0	0	0	1	0	1	0	0	0	1	0	0	1	1	0	0	1	0	0	0	1	0	0	0	0	0	0	0	0	0	SSM	2	0	2,1mm	1	> 1/mm2	IIIB	IIIA
38	w	1,3cm	0	0	0	0	1	0	0	0	1	0	0	0	1	1	1	0	0	1	1	0	0	1	0	0	0	1	0	0	0	0	0	0	0	0	0	SSM	2	0	0,8mm	1	1/mm2	IIIB	IIIA
39	w	1,2cm	0	0	1	0	0	0	1	0	0	0	1	0	0	0	0	0	0	1	0	0	0	1	0	0	0	0	0	0	0	0	0	0	0	0	0	NM	0	0	3,5mm	0	0	IIIB	IIIB
40	m	6,0cm	1	1	1	0	0	0	1	0	0	0	1	0	0	0	0	0	0	0	1	1	0	0	0	0	0	1	0	0	0	0	0	0	0	0	0	NM	1	0	3,7mm	1	0	IIIB	IIIB
41	w	2,2cm	1	1	1	0	0	0	1	0	0	0	1	0	0	0	0	0	0	0	1	1	0	0	0	0	0	0	0	0	0	0	0	0	0	0	0	SSM	2	0	3,25mm	1	0	IIIB	IIIB
42	w	3,8cm	1	1	1	0	0	0	1	0	0	0	1	0	0	0	0	0	0	0	1	1	0	0	0	0	0	0	0	0	0	0	0	0	0	0	1	ALM	2	0	3,05mm	1	> 1/mm2	IIIB	IIIB
43	w	2,7cm	1	1	0	0	1	0	1	0	0	0	1	0	0	0	0	1	0	0	1	1	0	0	0	0	0	1	1	0	0	0	0	0	0	0	0	SSM	2	0	11,0mm	1	> 1/mm2	IIIB	IIIB
44	m	2,5cm	1	1	1	0	0	0	1	0	0	0	1	0	0	0	0	0	0	1	1	0	0	1	1	0	1	0	1	0	0	0	0	0	0	0	0	ALM	0	0	2,2mm	0	< 1/mm2	IIIB	IIIB
45	m	0,7cm	0	0	1	0	0	0	0	0	1	1	0	0	1	1	1	0	0	0	0	0	0	1	0	0	0	0	0	0	0	0	0	0	0	0	0	SSM	0	0	0,95mm	0	> 1/mm2	IIIB	IIIB
46	m	3,2cm	1	1	1	0	0	0	0	0	1	1	1	0	0	0	1	1	0	0	1	1	0	0	0	0	0	1	0	0	0	0	0	0	0	0	1	ALM	2	0	5,0mm	1	> 1/mm2	IIIB	IIIB
47	m	4,5cm	1	1	0	1	0	0	0	0	1	0	1	0	0	0	1	0	0	1	1	1	0	0	0	0	0	1	0	0	0	0	0	0	0	0	1	ALM	2	0	2,5mm	1	> 1/mm2	IIIB	IIIB
48	w	1,3cm	0	0	0	1	1	0	1	0	0	0	0	0	1	0	1	0	0	1	1	0	0	1	0	0	0	1	1	0	0	0	0	0	0	0	0	SSM	2	0	1,6mm	0	< 1/mm2	IIIB	IIIB
49	m	1,0cm	1	1	0	0	1	1	1	0	0	0	0	0	1	1	0	0	0	0	0	0	0	1	1	0	1	0	0	0	0	0	0	0	0	0	0	SSM	2	0	1,6mm	1	< 1/mm2	IIIB
50	w	1,8cm	0	0	1	0	0	0	0	0	1	0	1	0	0	0	0	0	0	0	0	1	0	0	0	0	0	0	0	0	0	0	0	0	0	0	1	ALM	2	0	1,3mm	0	0	IIIB
51	w	1,5cm	0	0	0	1	1	0	0	0	1	1	0	0	1	1	0	0	0	1	0	0	0	1	1	0	0	0	0	0	0	0	0	0	0	0	0	SSM	2	0	2,7mm	0	> 1/mm2	IIIA	IIIA
52	w	1,0cm	0	0	0	0	1	0	0	0	1	0	1	0	0	0	0	0	0	1	0	1	0	0	0	0	0	1	0	0	0	0	0	0	0	0	0	SSM	2	0	1,0-1,05mm	0	> 1/mm2	IIIA	IIIA
53	w	2,5cm	0	0	0	0	1	0	1	0	0	0	1	0	0	0	0	1	0	1	0	0	0	1	0	0	0	1	0	0	0	0	0	0	0	0	0	NM	2	0	> 5,0mm	0	> 1/mm2	IIIA	IIIA
54	m	2,5cm	1	1	1	0	0	1	1	0	0	0	0	0	1	0	0	0	0	0	1	1	0	0	0	0	0	1	0	0	0	0	0	0	0	0	0	ALM	1	0	3,0mm	0	< 1/mm2	IIIA	IIIA
55	m	1,0cm	0	0	1	0	0	1	1	0	0	0	1	0	0	0	1	0	0	0	0	1	0	0	0	0	0	1	0	0	0	0	0	0	0	0	0	LM	2	0	1,8mm	0	0	IIIA	IIIA
56	m	2,3cm	0	0	0	0	1	0	0	0	1	0	0	0	1	1	1	1	0	0	0	0	0	1	0	0	0	1	1	1	0	0	1	0	0	0	0	SSM	2	0	0,95mm	0	1/mm2	IIIA	IIIA
57	m	1,0cm	0	0	1	0	0	0	1	0	0	0	0	0	0	1	1	0	0	1	0	0	0	1	0	0	0	0	0	0	0	0	0	0	0	0	0	SSM	2	0	1,1mm	0	> 1/mm2	IIIA	IIIA
58	m	1,1cm	1	1	1	0	0	1	0	0	1	1	1	0	0	0	1	0	0	0	1	1	0	0	0	0	0	1	0	0	0	0	0	0	0	0	1	ALM	2	0	< 1,0mm	0	< 1/mm2	IIIA	IIIA
59	w	1,1cm	1	1	1	0	0	0	1	0	0	0	1	0	0	0	0	0	0	0	0	1	0	0	0	0	0	0	0	0	0	0	0	0	0	0	0	SSM	2	0	4,35mm	0	> 1/mm2	IIIA
60	m	1,0cm	0	0	0	0	1	0	0	0	1	1	0	0	1	1	0	0	0	0	0	0	0	1	1	0	0	0	0	0	0	0	0	0	0	0	0	SSM	2	0	3,1mm	0	0	IIIA
61	w	1,2cm	0	0	1	0	0	0	0	0	1	1	1	0	0	0	0	0	0	0	0	1	0	0	0	0	0	1	0	0	0	0	1	0	0	0	0	LM	2	0	1,2mm	0	0	IIIA
62	m	2,5cm	1	1	1	0	0	0	1	0	0	0	1	0	0	0	0	0	0	1	0	0	0	1	0	0	0	0	0	0	0	0	1	0	0	0	0	LM	denied	0	8,0mm	1	0	IIC	IIC
63	m	1,8cm	1	1	1	0	0	0	1	0	0	0	1	0	0	0	0	0	0	1	0	0	0	1	0	0	0	0	0	0	0	0	0	0	0	0	0	NM	0	0	4,5mm	1	> 1/mm2	IIC	IIC
64	w	1,5cm	1	1	1	0	0	0	1	0	0	0	1	0	0	0	0	0	0	1	0	0	0	1	0	0	0	1	1	0	0	0	0	0	0	0	0	NM	0	0	10,0mm	1	> 1/mm2	IIC	IIC
65	m	8,0cm	1	1	1	0	0	0	1	0	0	0	1	0	0	0	0	0	0	0	1	1	0	0	0	0	0	1	0	0	0	0	0	0	0	0	0	NM	1	0	9,0mm	1	0	IIC	IIC
66	w	1,2cm	1	1	0	1	1	0	1	0	0	0	1	0	0	0	0	0	0	0	1	1	0	0	0	0	0	1	0	0	0	0	0	0	0	0	0	SSM	0	0	6,0mm	1	> 1/mm2	IIC	IIC
67	m	1,3cm	1	1	1	0	0	0	1	0	0	0	1	0	0	0	0	0	0	0	1	1	0	0	0	0	0	0	0	0	0	0	0	0	0	0	0	ALM	1	0	4,5mm	1	> 1/mm2	IIC	IIC
68	m	3,0cm	1	1	1	0	0	0	1	0	0	0	1	0	0	0	0	0	0	1	1	1	0	0	0	0	0	1	1	0	0	0	0	0	0	0	0	NM	1	0	4,5mm	1	> 1/mm2	IIC	IIC
69	w	4,5cm	1	1	0	0	1	0	0	0	1	0	1	0	0	0	0	0	1	1	1	1	0	0	0	0	0	1	0	0	0	0	0	0	0	0	0	ALM	0	0	21,0mm	1	0	IIC	IIC
70	w	3,3cm	1	1	1	0	0	0	1	0	0	0	1	0	0	0	1	0	0	1	0	0	0	1	0	0	0	1	0	0	0	0	0	0	0	0	0	NM	1	0	> 10,0mm	1	> 1/mm2	IIC	IIC
71	w	3,5cm	1	1	1	0	0	1	1	0	0	0	1	0	0	0	1	0	0	0	1	1	0	0	0	0	0	1	0	0	0	0	0	0	0	0	0	NM	1	0	4,5mm	1	> 1/mm2	IIC	IIC
72	m	3,0cm	1	1	1	0	0	0	1	0	0	0	1	0	0	0	1	0	0	1	1	1	0	0	0	0	0	1	0	0	0	0	0	0	0	0	0	NM	1	0	6mm	1	> 1/mm2	IIC	IIC
73	w	2,3cm	1	1	1	0	0	0	1	0	0	0	1	0	0	0	1	0	0	1	1	1	0	0	0	0	0	1	1	0	0	0	0	0	0	0	0	ALM	0	0	6,0mm	0	< 1/mm2	IIC	IIC
74	w	1,9cm	1	1	1	0	0	0	1	0	0	0	1	0	0	0	1	0	0	1	1	1	0	0	0	0	0	1	1	1	1	1	1	0	0	0	0	NM	1	0	5,5mm	1	> 1/mm2	IIC	IIC
75	m	2,5cm	1	1	1	0	0	0	1	0	0	0	1	0	0	0	1	0	0	1	1	1	0	0	0	0	0	1	0	0	0	0	0	0	0	0	0	NM	1	0	7.0mm	1	> 1/mm2	IIC	IIC
76	w	1,4cm	1	1	1	0	0	0	1	0	0	0	1	0	0	0	0	0	0	0	0	1	0	0	0	0	0	0	0	0	0	0	0	0	0	0	0	NM	1	0	7,0mm	1	> 1/mm2	IIC
77	w	4,8cm	1	1	1	0	0	0	1	0	0	0	1	0	0	0	0	1	0	0	1	1	0	0	0	0	0	1	0	0	1	1	1	0	0	0	0	LMM	0	0	3,9mm	1	> 1/mm2	IIB	0
78	w	0,8cm	1	1	1	0	0	0	1	0	0	0	0	0	1	1	0	1	0	1	0	1	0	0	0	0	0	1	0	0	0	0	0	0	0	0	0	SSM	1	0	2,7mm	1	< 1/mm2	IIB	IIA
79	m	2,4cm	1	1	1	0	0	0	1	0	0	0	1	0	0	0	1	0	0	0	1	1	0	0	0	0	0	1	0	0	0	0	0	0	0	0	0	NM	0	0	3,2mm	1	0	IIB	IIA
80	m	1,0cm	1	1	1	0	0	0	0	0	1	1	1	0	0	0	1	0	0	1	1	1	0	0	0	0	0	1	0	0	0	0	0	0	0	0	0	NM	Not possible	0	2,25mm	1	> 1/mm2	IIB	IIA
81	w	1,0cm	1	1	1	0	0	0	1	0	0	0	1	0	0	0	0	0	0	1	0	1	0	0	0	0	0	1	1	0	0	0	0	0	0	0	0	ALM	0	0	3,5mm	1	> 1/mm2	IIB	IIB
82	w	1,0cm	1	1	1	0	0	0	1	0	0	0	1	0	0	0	0	0	0	1	0	0	0	1	0	0	0	0	0	0	0	0	0	0	0	0	0	NM	1	0	2,75mm	1	> 1/mm2	IIB	IIB
83	m	2,0cm	1	1	0	0	1	0	1	0	0	0	1	0	0	0	0	0	0	1	0	1	0	0	0	0	0	0	1	1	1	1	1	0	0	0	0	LM	0	0	2,3mm	1	> 1/mm2	IIB	IIB
84	m	1,1cm	0	0	1	0	0	0	1	0	0	0	1	0	0	0	0	0	0	0	1	1	0	0	0	0	0	0	0	0	0	0	0	0	0	0	0	Desmoplastic MM	0	0	11mm	0	0	IIB	IIB
85	m	1,7cm	1	1	1	0	0	0	1	0	0	0	1	0	0	0	0	0	0	1	1	1	0	0	0	0	0	1	1	0	0	0	0	0	0	0	0	NM	1	0	3,5mm	1	> 1/mm2	IIB	IIB
86	m	2,5cm	1	1	0	0	1	0	1	0	0	0	1	0	0	0	0	1	1	1	1	1	0	0	0	0	0	1	0	0	0	0	0	0	0	0	0	SSM	0	0	2,1mm	1	< 1/mm2	IIB	IIB
87	m	1,2cm	1	1	1	0	0	0	1	0	0	0	1	0	0	0	1	0	0	1	0	1	0	0	0	0	0	0	0	0	0	0	0	0	0	0	0	NM	0	0	6,0mm	1	> 1/mm2	IIB	IIB
88	m	1,2cm	1	1	1	0	0	0	0	0	1	0	1	0	0	0	1	0	0	0	1	1	0	0	0	0	0	1	0	1	1	1	1	0	0	0	0	NM	0	0	3,5mm	1	> 1/mm2	IIB	IIB
89	w	5,0cm	1	1	1	0	0	0	1	0	0	0	1	0	0	0	1	0	0	0	1	1	0	0	0	0	0	1	0	0	0	0	0	0	0	0	0	SSM	0	0	3,4mm	1	0	IIB	IIB
90	w	1,1cm	1	1	1	0	0	0	0	0	1	0	1	0	0	0	1	0	0	1	1	0	0	1	0	0	0	1	0	0	0	0	0	0	0	0	0	NM	1	0	2,1mm	1	> 1/mm2	IIB	IIB
91	m	0,9cm	1	1	1	0	0	0	0	0	1	1	1	0	0	0	1	0	0	1	1	0	0	1	0	0	0	1	0	0	0	0	0	0	0	0	0	NM	denied	0	2,1mm	1	0	IIB	IIB
92	m	1,5cm	1	1	1	0	0	0	1	0	0	0	1	0	0	0	0	0	0	0	0	1	0	0	0	0	0	1	1	0	0	0	0	0	0	0	0	NM	0	0	4,0mm	1	> 1/mm2	IIB
93	m	1,7cm	1	1	0	0	1	0	1	0	0	0	1	0	0	0	0	1	1	0	0	1	0	0	0	0	0	0	0	0	0	0	0	0	0	0	0	NM	0	0	3,82mm	1	0	IIB
94	w	1,6cm	1	1	1	0	0	0	1	0	0	0	1	0	0	0	0	0	0	0	0	1	0	0	0	0	0	1	0	0	0	0	0	0	0	0	1	ALM	1	0	3,0mm	1	0	IIB
95	m	3,5cm	1	1	1	0	0	0	1	0	0	0	1	0	0	0	0	0	0	0	0	0	0	1	0	0	0	0	0	0	1	1	1	0	0	0	0	LM	0	0	3,0mm	1	> 1/mm2	IIB
96	w	0,7cm	1	1	1	0	0	0	1	0	0	0	1	0	0	0	0	0	0	0	0	1	0	0	0	0	0	0	0	1	1	1	1	0	0	0	0	LM	0	0	2,2mm	1	0	IIB
97	w	1,8cm	1	1	1	0	0	0	1	0	0	0	1	0	0	0	0	0	1	0	0	1	0	0	0	0	0	1	0	1	1	1	1	0	0	0	0	LMM	0	0	2,1mm	1	1/mm2	IIB
98	w	0,2cm	0	0	1	0	0	0	1	0	0	0	1	0	0	0	0	0	0	1	0	1	0	0	0	0	0	0	0	1	0	0	0	0	0	0	0	LM	0	0	2,6mm	0	0	IIA	IIA
99	m	1,5cm	0	0	1	0	0	0	0	0	1	0	1	0	0	0	0	1	0	1	0	0	0	1	0	0	0	0	0	0	0	0	0	0	0	0	0	LM	0	0	2,5mm	0	> 1/mm2	IIA	IIA
100	w	2,6cm	0	0	1	0	0	0	0	0	1	0	0	0	1	1	0	0	0	1	0	0	0	1	1	0	0	1	1	0	0	0	0	0	0	0	0	Mucosa	1	0	2,4mm	0	> 2/mm2	IIA	IIA
101	m	1,2cm	1	1	1	0	0	0	1	0	0	0	1	0	0	0	0	0	0	1	0	1	0	0	0	0	0	0	0	0	0	0	1	0	0	0	0	LM	0	0	1,3mm	1	< 1/mm2	IIA	IIA
102	w	1,2cm	1	1	1	0	0	0	0	0	1	1	1	0	0	0	0	0	1	1	0	0	0	1	0	0	0	1	0	0	0	0	0	0	0	0	0	SSM	1	0	1,1mm	1	> 1/mm2	IIA	IIA
103	m	2,2cm	0	0	0	0	1	0	0	0	0	1	1	0	0	0	0	0	0	0	1	0	0	1	0	0	0	1	0	0	0	0	0	0	0	0	0	SSM	1	0	2,7mm	0	> 1/mm2	IIA	IIA
104	m	3,0cm	1	1	0	1	0	0	1	0	0	0	1	0	0	0	0	0	0	0	1	0	0	1	0	0	0	1	0	0	0	0	0	0	0	0	0	SSM	0	0	1,95mm	1	< 1/mm2	IIA	IIA
105	m	1,0cm	1	1	0	0	1	0	1	0	0	0	1	0	0	0	0	0	0	0	1	1	0	0	0	0	0	1	0	0	0	0	0	0	0	0	0	NM	0	0	1,5mm	1	> 1/mm2	IIA	IIA
106	w	1,5cm	1	1	1	0	0	0	0	0	1	0	1	0	0	0	0	1	0	0	1	0	0	1	0	0	0	0	0	0	0	0	0	0	0	0	0	SSM	1	0	1,25mm	1	> 1/mm2	IIA	IIA
107	m	1,6cm	1	1	0	0	1	0	0	0	1	0	0	0	1	1	0	0	0	1	1	1	0	0	0	0	0	0	0	0	0	0	0	0	0	0	0	SSM	0	0	2,5mm	0	> 1/mm2	IIA	IIA
108	m	3,0cm	1	1	1	0	0	0	1	0	0	0	1	0	0	0	0	0	0	1	1	0	0	1	0	0	0	0	0	0	0	0	0	1	0	0	1	ALM	1	0	2,3mm	0	0	IIA	IIA
109	m	0,7cm	0	0	0	0	1	0	0	0	1	1	0	0	1	1	0	0	0	1	1	0	0	1	1	0	0	1	0	0	0	0	0	0	0	0	0	NM	0	0	2,2mm	0	> 1/mm2	IIA	IIA
110	w	3,5cm	1	1	1	0	0	0	1	0	0	0	1	0	0	0	0	0	1	1	1	0	0	1	0	0	0	0	0	0	0	0	0	0	0	0	0	SSM	1	0	1,05mm	1	0	IIA	IIA
111	m	1,9cm	0	0	0	1	1	0	0	0	1	1	1	0	0	0	1	0	0	0	0	1	0	0	0	0	0	0	0	0	0	0	0	0	0	0	0	SSM	1	0	1,6mm	1	< 1/mm2	IIA	IIA
112	m	1,7cm	1	1	0	0	1	0	1	0	0	0	0	0	1	0	1	0	0	1	0	0	0	1	0	0	0	1	0	0	0	0	0	0	0	0	0	SSM	1	0	2,8mm	0	0	IIA	IIA
113	w	1,4cm	0	0	1	0	0	0	1	0	0	0	1	0	0	0	1	0	0	1	0	0	0	1	0	0	0	1	0	0	0	0	0	0	0	0	0	SSM	0	0	2,5mm	0	> 1/mm2	IIA	IIA
114	w	2,1cm	0	0	0	0	1	0	0	0	1	0	1	0	0	0	1	0	0	1	0	1	0	0	0	0	0	0	0	0	0	0	0	0	0	0	0	LM	0	0	1,75mm	1	> 1/mm2	IIA	IIA
115	m	1,7cm	1	1	1	0	0	0	1	0	0	0	0	0	1	1	1	0	0	1	0	1	0	0	0	0	0	0	0	0	0	0	0	0	0	0	0	SSM	1	0	1,03mm	1	< 1/mm2	IIA	IIA
116	w	2,5cm	1	1	1	0	0	0	1	0	0	0	1	0	0	0	1	0	0	0	1	1	0	0	0	0	0	1	0	0	0	0	0	0	0	0	0	NM	0	0	3,5mm	1	> 1/mm2	IIA	IIA
117	m	1,0cm	0	0	1	0	0	0	1	0	0	0	1	0	0	0	1	0	0	0	1	1	0	0	0	0	0	1	0	0	0	0	0	0	0	0	0	SSM	0	0	2,1mm	0	> 1/mm2	IIA	IIA
118	w	3,0cm	1	1	0	0	1	0	1	0	0	0	0	0	1	1	1	1	0	0	1	0	0	1	0	0	0	1	0	0	0	0	0	0	0	0	0	SSM	0	0	1,05mm	1	< 1/mm2	IIA	IIA
119	w	1,6cm	0	0	0	0	1	0	0	0	1	1	1	0	0	0	1	0	0	1	1	1	0	0	0	0	0	1	0	0	0	0	0	0	0	0	0	SSM	1	0	3,75mm	0	0	IIA	IIA
120	w	1,2cm	1	1	1	0	0	0	0	0	1	0	1	0	0	0	1	0	0	1	1	1	0	0	0	0	0	0	0	0	0	0	0	0	0	0	0	ALM	0	0	2,5mm	0	> 1/mm2	IIA	IIA
121	m	2,3cm	0	0	1	0	0	0	0	0	1	1	1	0	0	0	1	0	1	1	1	1	0	0	0	0	0	0	1	0	0	0	0	0	0	0	0	SSM	1	0	2,4mm	0	> 1/mm2	IIA	IIA
122	w	1,2cm	1	1	0	0	1	0	1	0	0	0	1	0	0	0	1	0	0	1	1	1	0	0	0	0	0	0	0	0	0	0	0	0	0	0	0	SSM	1	0	1,5mm	1	> 1/mm2	IIA	IIA
123	m	3,6cm	0	0	0	1	1	0	0	0	1	1	1	0	0	0	1	1	1	1	1	0	0	1	0	0	0	0	0	0	0	0	0	0	0	0	0	SSM	1	0	1,1mm	1	< 1/mm2	IIA	IIA
124	m	1,2cm	1	1	1	0	0	0	1	0	0	0	1	0	0	0	0	0	0	0	0	1	0	0	0	0	0	1	0	1	0	0	1	0	0	0	0	LM	0	0	3,4mm	0	> 1/mm2	IIA
125	m	1,2cm	0	0	0	0	0	0	1	0	0	0	1	0	0	0	0	0	0	0	0	0	0	1	0	0	0	0	1	0	0	0	0	0	0	0	0	LM	0	0	1,5mm	1	> 1/mm2	IIA
126	w	3,8cm	1	1	0	0	1	0	1	0	0	0	1	0	0	0	0	0	1	0	0	0	0	1	0	0	0	1	0	0	0	0	0	0	0	0	0	SSM	0	0	1,5mm	1	< 1/mm2	IIA
127	w	2,0cm	1	1	1	0	0	0	0	0	1	0	0	0	1	1	0	0	0	0	0	1	0	0	0	0	0	1	1	0	0	0	0	0	0	0	0	SSM	1	0	1,3mm	1	< 1/mm2	IIA
128	m	3,0cm	1	1	1	0	0	0	1	0	0	0	0	0	0	0	0	0	0	0	0	1	0	0	0	0	0	0	0	1	0	0	1	0	0	0	0	LM	1	0	1,38mm	1	< 1/mm2	IIA
129	m	1,2cm	1	1	1	0	0	0	0	0	1	0	1	0	0	0	0	1	0	0	0	0	0	1	0	0	0	1	0	0	0	0	0	0	0	0	0	SSM	1	0	1,1mm	1	1/mm2	IIA
130	m	4,3cm	0	0	0	0	1	0	0	0	1	0	1	0	0	0	0	1	0	0	1	1	0	0	0	0	0	1	0	0	0	0	0	0	0	0	0	SSM	1	0	< 0,75mm	0	> 1/mm2	IB	IA
131	m	1,0cm	0	0	0	1	1	0	0	0	1	0	1	0	0	0	0	0	0	1	0	1	0	0	0	0	0	0	0	0	0	0	0	0	0	0	0	SSM	1	0	1,7mm	0	< 1/mm2	IB	IB
132	w	1,0cm	0	0	1	0	0	0	0	0	1	0	1	0	0	0	0	0	0	1	0	1	0	0	0	0	0	0	0	0	0	0	0	1	0	0	0	ALM	1	0	1,6mm	0	> 1/mm2	IB	IB
133	w	3,1cm	1	1	1	0	0	0	0	0	1	0	1	0	0	0	0	0	1	1	0	1	0	0	0	0	0	0	0	0	0	0	0	0	0	0	1	ALM	1	0	1,6-1,9mm	0	0	IB	IB
134	w	0,8cm	0	0	0	0	1	0	0	0	1	0	0	0	1	1	0	0	0	1	0	1	0	0	0	0	0	0	0	0	0	0	0	0	0	0	0	SSM	1	0	1,4mm	0	> 1/mm2	IB	IB
135	m	2,2cm	0	0	0	0	1	0	0	0	1	0	1	0	0	0	0	0	1	1	0	0	0	1	0	0	0	0	0	0	0	0	0	0	0	0	0	SSM	0	0	1,05mm	0	< 1/mm2	IB	IB
136	w	1,5cm	0	0	1	0	0	0	0	0	1	0	0	0	1	1	0	0	0	1	0	0	0	1	0	0	0	0	0	0	0	0	0	0	0	0	0	SSM	0	0	1,05mm	0	< 1/mm2	IB	IB
137	w	1,2cm	0	0	1	0	0	0	0	0	1	0	0	0	1	1	0	0	0	1	0	1	0	0	0	0	0	1	0	0	0	0	0	0	0	0	0	SSM	0	0	0,9mm	0	1/mm2	IB	IB
138	m	1,3cm	1	1	0	0	1	0	0	0	1	1	0	0	1	1	0	1	0	1	0	0	0	1	0	0	0	0	0	0	0	0	0	0	0	0	0	SSM	1	0	0,95mm	0	> 1/mm2	IB	IB
139	w	1,2cm	0	0	0	0	1	1	0	1	0	0	1	0	0	0	0	0	0	1	0	0	0	1	0	0	0	1	0	0	0	0	0	0	0	0	0	SSM	1	0	0,95mm	0	> 1/mm2	IB	IB
140	w	1,4cm	1	0	1	0	0	0	1	0	0	0	1	0	0	0	0	0	1	1	0	1	0	0	0	0	0	1	0	0	0	0	0	0	0	0	0	SSM	0	0	0,8mm	1	> 1/mm2	IB	IB
141	w	1,0cm	0	0	0	0	1	0	0	0	1	1	0	0	1	1	0	0	0	1	0	1	0	0	0	0	0	0	0	0	0	0	0	0	0	0	0	SSM	1	0	0,87mm	0	> 1/mm2	IB	IB
142	w	1,5cm	0	0	0	0	1	0	0	0	1	0	0	0	1	1	0	1	0	1	0	0	1	0	0	0	0	0	0	0	0	0	0	0	0	0	0	SSM	1	0	0,85mm	0	> 1/mm2	IB	IB
143	m	0,7cm	0	0	1	0	0	0	0	0	1	1	0	0	1	1	0	0	0	1	0	0	0	1	0	0	0	0	0	0	0	0	0	0	0	0	0	SSM	0	0	0,7mm	0	1/mm2	IB	IB
144	w	0,9cm	0	0	0	0	1	0	0	0	1	1	0	0	1	1	0	0	0	1	0	1	0	0	0	0	0	0	0	0	0	0	0	0	0	0	0	SSM	0	0	0,7mm	0	1/mm2	IB	IB
145	m	0,9cm	0	0	0	0	1	0	0	0	1	1	0	0	0	1	0	0	0	1	0	0	0	1	0	0	0	1	0	0	0	0	0	0	0	0	0	SSM	0	0	0,75mm	0	> 1/mm2	IB	IB
146	w	1,4cm	0	0	0	0	1	0	0	0	1	0	0	0	1	1	0	0	0	1	0	1	0	0	0	0	0	0	0	0	0	0	0	0	0	0	0	SSM	1	0	0,6mm	0	> 1/mm2	IB	IB
147	w	1,5cm	1	1	1	0	0	0	0	0	1	1	0	0	0	1	0	0	0	1	0	0	0	1	1	0	0	0	0	0	0	0	0	0	0	0	0	SSM	1	0	< 1,0mm	1	< 1/mm2	IB	IB
148	w	0,6cm	0	0	1	0	0	0	0	0	1	0	1	0	0	0	0	0	1	1	0	1	0	0	0	0	1	0	0	0	0	0	0	0	0	0	0	SSM	0	0	< 0,75mm	1	0	IB	IB
149	w	1,2cm	0	0	1	0	0	0	0	0	1	0	0	0	0	1	0	0	0	1	0	0	0	1	0	0	0	0	0	0	0	0	0	0	0	0	0	SSM	0	0	< 0,75mm	0	> 1/mm2	IB	IB
150	w	3,0cm	0	0	1	0	0	0	1	0	0	0	1	0	0	0	0	0	0	1	0	1	0	0	0	0	0	0	0	1	1	1	0	0	0	0	0	LMM	0	0	< 0,6mm	0	> 1/mm2	IB	IB
151	m	0,9cm	0	0	0	0	1	0	0	0	1	0	0	0	1	1	0	0	0	1	0	0	0	1	0	0	0	0	0	0	0	0	0	0	0	0	0	SSM	0	0	< 0,5mm	0	1/mm2	IB	IB
152	m	1,5cm	0	0	0	0	1	0	0	0	1	1	0	0	1	0	0	0	0	1	0	1	0	0	0	0	0	0	0	0	0	0	0	0	0	0	0	SSM	0	0	< 0,5mm	0	> 1/mm2	IB	IB
153	w	5,0cm	0	0	0	1	1	0	0	0	1	0	0	0	0	1	0	0	1	1	0	1	0	0	0	0	0	0	0	0	0	0	0	0	0	0	0	SSM	0	0	< 0,5mm	1	< 1/mm2	IB	IB
154	w	2,5cm	0	0	0	1	0	0	1	0	0	0	0	0	1	0	0	0	0	1	0	1	0	0	0	0	0	0	0	0	0	0	0	0	0	0	0	SSM	0	0	< 0,75mm	0	> 1/mm2	IB	IB
155	w	1,8cm	0	0	1	0	0	0	0	0	1	0	1	0	0	0	0	0	0	0	1	1	0	0	0	0	0	1	0	1	0	0	1	0	0	0	0	LM	0	0	1,4mm	0	0	IB	IB
156	m	1,2cm	0	0	0	1	1	0	0	0	1	0	1	0	0	0	0	0	0	0	1	1	0	0	0	0	0	1	1	0	0	0	0	0	0	0	0	SSM	1	0	1,1mm	0	< 1/mm2	IB	IB
157	m	2,0cm	1	1	1	0	0	0	1	0	0	0	1	0	0	0	0	0	0	0	1	1	0	0	0	0	0	1	0	0	0	0	0	0	0	0	0	ALM	0	0	0,7mm	1	1/mm2	IB	IB
158	w	1,1cm	0	0	1	0	0	0	1	0	0	0	1	0	0	0	0	0	0	0	1	1	0	0	0	0	0	1	0	0	0	0	0	0	0	0	0	LM	0	0	< 1,0mm	0	1/mm2	IB	IB
159	m	2,7cm	1	1	1	0	0	0	0	0	1	0	1	0	0	0	0	1	0	1	1	1	0	0	0	0	0	0	0	0	1	1	1	0	0	0	0	LM	0	0	1,5mm	0	< 1/mm2	IB	IB
160	m	1,6cm	0	0	1	0	0	0	0	0	1	0	0	0	1	1	0	1	0	1	1	0	0	1	0	0	0	0	0	0	0	0	0	0	0	0	0	SSM	0	0	0,7mm	0	< 2/mm2	IB	IB
161	w	1,4cm	0	0	0	0	1	0	0	0	1	0	0	0	0	1	0	0	0	1	1	0	0	1	0	0	0	0	0	0	0	0	0	0	0	0	0	SSM	0	0	0,6mm	0	1/mm2	IB	IB
162	w	0,9cm	1	1	1	0	0	0	1	0	0	0	0	0	1	1	0	1	1	1	1	1	0	0	0	0	0	0	0	0	0	0	0	0	0	0	0	SSM	0	0	< 0,5mm	1	> 1/mm2	IB	IB
163	m	0,7cm	0	0	1	0	0	0	0	0	0	1	1	0	0	0	1	0	0	0	0	1	0	0	0	0	0	0	0	0	0	0	0	0	0	0	0	SSM	1	0	0,9mm	0	2/mm2	IB	IB
164	w	0,7cm	0	0	0	0	1	0	0	0	1	1	1	0	0	0	1	0	0	0	0	0	0	1	0	0	0	0	0	0	0	0	0	0	0	0	0	SSM	0	0	< 0,5mm	0	1/mm2	IB	IB
165	w	1,5cm	0	0	1	0	0	1	0	0	1	1	1	0	0	0	1	0	0	1	0	0	0	1	0	0	0	0	0	0	0	0	0	0	0	0	0	SSM	1	0	1,37mm	0	< 1/mm2	IB	IB
166	m	0,8cm	0	0	1	0	0	0	1	0	0	0	1	0	0	0	1	0	0	1	0	0	0	1	0	0	0	0	0	0	0	0	0	0	0	0	0	NM	1	0	1,2mm	0	> 1/mm2	IB	IB
167	m	0,6cm	1	1	1	0	0	1	0	0	0	1	1	0	0	0	1	0	0	1	0	0	0	1	0	0	0	1	0	0	0	0	0	0	0	0	0	SSM	1	0	1,25mm	0	> 1/mm2	IB	IB
168	m	1,5cm	0	0	0	1	1	0	0	0	1	1	0	0	0	1	1	0	0	1	0	0	0	1	0	0	0	0	0	0	0	0	0	0	0	0	0	SSM	1	0	1,0mm	0	< 1/mm2	IB	IB
169	m	1,5cm	1	0	1	0	0	0	1	0	0	0	0	0	1	0	1	0	1	1	0	0	0	1	0	0	0	0	0	1	0	0	1	0	0	0	0	SSM	1	0	0,9mm	1	2/mm2	IB	IB
170	m	0,8cm	0	0	0	1	1	0	0	0	1	0	0	0	1	1	1	0	0	1	0	0	0	1	0	0	0	0	0	0	0	0	0	0	0	0	0	SSM	0	0	0,9mm	0	1/mm2	IB	IB
171	m	1,1cm	0	0	0	1	1	0	0	0	1	0	1	0	0	0	1	1	0	1	0	0	0	1	0	0	0	0	0	0	0	0	0	0	0	0	0	SSM	0	0	0,9mm	1	< 1/mm2	IB	IB
172	m	0,8cm	1	1	0	0	1	0	1	0	0	0	0	0	0	1	1	0	0	1	0	0	0	1	0	0	0	0	0	0	0	0	0	0	0	0	0	SSM	0	0	0,8mm	1	2/mm2	IB	IB
173	w	0,7cm	0	0	1	0	0	0	0	0	1	1	1	0	0	0	1	0	0	1	0	1	0	0	0	1	0	0	0	0	0	0	0	0	0	0	0	LM	1	0	0,6mm	0	1/mm2	IB	IB
174	m	1,5cm	1	1	0	0	1	0	0	0	1	0	0	0	1	1	1	0	0	1	0	1	0	0	0	0	0	0	0	0	0	0	0	0	0	0	0	NM	1	0	0,62mm	1	> 1/mm2	IB	IB
175	m	1,4cm	0	0	0	0	1	0	0	0	1	0	0	0	1	1	1	0	0	1	0	1	0	0	0	0	0	0	0	0	0	0	0	0	0	0	0	SSM	0	0	< 0,5mm	0	1/mm2	IB	IB
176	w	0,9cm	0	0	1	0	0	0	0	0	1	0	1	0	0	0	1	0	0	0	1	1	0	0	0	0	0	1	0	0	0	0	0	0	0	0	0	SSM	1	0	1,8mm	0	> 1/mm2	IB	IB
177	w	1,0cm	0	0	0	0	1	0	0	0	1	0	0	0	1	1	1	0	0	0	1	0	0	1	0	0	0	1	0	0	0	0	0	0	0	0	0	SSM	1	0	1,2mm	0	< 1/mm2	IB	IB
178	w	4,3cm	0	0	0	0	1	0	0	0	1	1	0	0	1	1	1	0	0	0	1	1	0	0	0	0	0	1	0	0	0	0	0	0	0	0	0	SSM	1	0	1,05mm	0	< 1/mm2	IB	IB
179	m	3,1cm	0	0	0	0	1	1	0	0	1	0	1	0	0	0	1	0	1	0	1	0	0	1	0	0	0	1	0	0	0	0	0	0	0	0	0	SSM	0	0	0,8mm	0	1/mm2	IB	IB
180	m	1,3cm	0	0	0	1	1	0	0	0	1	0	1	0	0	0	1	1	0	1	1	0	0	1	0	0	0	1	0	0	0	0	0	0	0	0	0	SSM	0	0	0,8mm	0	1/mm2	IB	IB
181	m	0,9cm	0	0	0	0	1	0	0	0	1	0	1	0	0	0	1	0	1	1	1	0	0	1	0	0	0	0	0	0	0	0	0	0	0	0	0	LM	0	0	0,75mm	0	> 1/mm2	IB	IB
182	w	1,5cm	0	0	1	0	0	0	0	0	1	0	1	0	0	0	0	1	0	0	0	0	0	1	0	0	0	1	0	0	0	0	0	0	0	0	0	SSM	1	0	1,1mm	0	> 1/mm2	IB
183	w	0,6cm	0	0	1	0	0	0	0	0	1	0	1	0	0	0	0	0	0	0	0	1	0	0	0	0	0	1	0	1	0	0	0	0	0	0	0	LMM	0	0	1,05mm	0	1/mm2	IB
184	w	2,4cm	0	0	1	0	0	0	1	0	0	0	1	0	0	0	0	0	0	0	0	1	0	0	0	0	0	0	0	0	1	1	0	0	0	0	0	SSM	1	0	0,9mm	0	1/mm2	IB
185	m	6,0cm	0	0	1	0	0	0	1	0	0	0	1	0	0	0	0	0	0	0	0	0	0	1	0	0	0	0	0	0	0	0	0	0	0	0	1	ALM	0	0	0,8mm	0	> 1/mm2	IB
186	w	0,9cm	0	0	0	0	1	0	0	0	0	1	1	0	0	0	0	0	0	0	0	1	0	0	0	1	1	0	0	0	0	0	0	0	0	0	0	SSM	0	0	0,82mm	1	0	IB
187	m	2,2cm	0	0	0	0	1	1	1	0	0	0	1	0	0	0	0	0	1	0	0	1	0	0	0	0	0	1	0	0	0	0	0	0	0	0	0	SSM	0	0	0,6mm	1	< 1/mm2	IB
188	m	0,9cm	0	0	1	0	0	0	1	0	0	0	1	0	0	0	0	0	0	0	0	0	0	1	0	0	0	0	0	0	1	1	1	0	0	0	0	LM	0	0	0,6mm	0	1/mm2	IB
189	m	0,3cm	0	0	0	1	1	0	1	0	0	0	1	0	0	0	0	0	0	0	0	0	0	1	0	0	0	0	0	0	0	0	0	0	0	0	0	SSM	0	0	0,5mm	0	1/mm2	IB
190	w	2,1cm	1	1	1	0	0	0	1	0	0	0	1	0	0	0	0	0	0	0	0	1	0	0	0	0	0	0	0	1	1	1	1	0	0	0	0	SSM	0	0	0,4mm	1	< 1/mm2	IB
191	m	0,3cm	0	0	1	0	0	0	1	0	0	0	0	0	1	1	0	0	0	0	0	0	0	1	0	0	0	0	0	0	0	0	0	0	0	0	0	SSM	0	0	< 0,5mm	0	> 1/mm2	IB
192	w	1,7cm	0	0	0	0	1	1	1	0	0	0	1	0	0	0	0	1	0	0	0	1	0	0	0	0	0	1	0	0	0	0	0	0	0	0	0	SSM	0	0	< 0,5mm	1	< 1/mm2	IB
192	w	1,0cm	0	0	0	0	1	0	0	0	1	0	1	0	0	0	0	0	0	0	0	1	0	0	0	0	0	0	0	0	0	0	0	0	0	0	0	SSM	0	0	< 0,5mm	0	> 1/mm2	IB
193	m	1,5cm	0	0	0	0	1	0	0	0	1	0	1	0	0	0	0	1	0	0	0	1	0	0	0	0	0	0	0	0	0	0	0	0	0	0	0	SSM	0	0	0,65mm	0	> 1/mm2	IB
194	w	0,7cm	0	0	1	0	0	0	0	0	1	1	1	0	0	0	0	1	0	0	0	1	0	0	0	0	0	0	0	0	0	0	0	0	0	0	0	SSM	1	0	1,75mm	0	> 1/mm2	IB
195	m	1,2cm	0	0	0	0	1	0	0	0	0	1	1	0	0	0	0	1	1	0	0	0	0	1	0	0	0	0	0	0	0	0	0	0	0	0	0	SSM	0	0	0,6mm	1	< 1/mm2	IB
196	w	0,5cm	0	0	0	0	1	0	0	0	1	1	1	0	0	0	0	0	0	1	0	1	0	0	0	0	0	0	0	0	0	0	0	0	0	0	0	SSM	0	0	0,9mm	0	< 1/mm2	IA	IA
197	w	0,6cm	0	0	1	0	0	0	0	0	1	0	0	0	1	1	0	0	0	1	0	0	0	1	0	0	0	0	0	0	0	0	0	0	0	0	0	SSM	0	0	0,92mm	0	< 1/mm2	IA	IA
198	w	0,7cm	0	0	0	0	1	0	0	0	1	1	1	0	0	0	0	0	0	1	0	1	0	0	0	0	0	0	0	0	0	0	0	0	0	0	0	SSM	0	0	0,87mm	0	< 1/mm2	IA	IA
199	m	0,6cm	0	0	0	0	1	0	0	0	1	1	1	0	0	0	0	1	0	1	0	1	0	0	0	0	0	1	0	0	0	0	0	0	0	0	0	SSM	0	0	0,7mm	0	< 1/mm2	IA	IA
200	w	0,9cm	0	0	0	0	1	0	1	0	0	0	0	0	1	1	0	0	0	1	0	1	0	0	0	0	0	0	0	0	0	0	0	0	0	0	0	SSM	0	0	0,7mm	0	< 1/mm2	IA	IA
201	w	0,9cm	0	0	0	1	1	0	1	0	0	0	1	0	0	0	0	0	1	1	0	1	0	0	0	0	1	0	0	0	0	0	0	0	0	0	0	SSM	0	0	0,75mm	0	< 1/mm2	IA	IA
202	m	1,2cm	0	0	1	0	0	0	1	0	0	0	1	0	0	0	0	0	0	1	0	1	0	0	0	0	0	0	1	0	0	0	0	0	0	0	1	ALM	0	0	0,75mm	0	< 1/mm2	IA	IA
203	m	1,0cm	0	0	1	0	0	0	0	0	1	0	0	0	1	1	0	0	0	1	0	1	0	0	0	0	0	0	0	0	0	0	0	0	0	0	0	SSM	0	0	0,6mm	0	< 1/mm2	IA	IA
204	w	1,3cm	0	0	0	1	1	0	0	0	1	0	1	0	0	0	0	0	0	1	0	0	0	1	0	0	0	0	1	0	0	0	0	0	0	0	0	SSM	0	0	0,6mm	0	< 1/mm2	IA	IA
205	m	0,4cm	0	0	1	0	0	0	1	0	0	0	1	0	0	0	0	1	1	1	0	1	0	0	0	0	0	0	0	1	0	0	0	0	0	0	0	LM	0	0	0,6mm	0	< 1/mm2	IA	IA
206	w	1,5cm	0	0	0	1	1	0	1	0	0	0	1	0	0	0	0	0	0	1	0	0	0	1	0	0	0	0	0	0	0	0	0	0	0	0	0	SSM	0	0	0,6mm	0	< 1/mm2	IA	IA
207	m	0,8cm	0	0	1	0	0	0	1	0	0	0	1	0	0	0	0	0	0	1	0	1	0	0	0	0	0	0	0	1	0	0	1	0	0	0	0	LM	0	0	0,5mm	0	< 1/mm2	IA	IA
208	m	0,8cm	0	0	0	1	1	0	0	0	1	0	0	0	1	1	0	0	0	1	0	1	0	0	0	0	0	0	0	0	0	0	0	0	0	0	0	SSM	0	0	0,5mm	0	< 1/mm2	IA	IA
209	m	0,5cm	0	0	0	0	1	0	0	0	1	1	0	0	1	1	0	1	1	1	0	0	0	1	0	0	0	1	0	0	0	0	0	0	0	0	0	SSM	0	0	0,55mm	0	< 1/mm2	IA	IA
210	m	1,6cm	0	0	1	0	0	0	1	0	0	0	1	0	0	0	0	0	1	1	0	0	0	1	0	0	0	0	0	0	0	0	0	0	0	0	0	SSM	0	0	0,4mm	0	< 1/mm2	IA	IA
211	m	0,6cm	0	0	0	0	1	0	1	0	0	0	0	0	1	1	0	0	0	1	0	1	0	0	0	0	0	0	0	0	0	0	0	0	0	0	0	SSM	0	0	0,48mm	0	< 1/mm2	IA	IA
212	m	0,7cm	0	0	0	1	1	0	0	0	1	0	1	0	0	0	0	0	0	1	0	0	0	1	0	0	0	0	0	0	0	0	0	0	0	0	0	SSM	0	0	0,3mm	0	< 1/mm2	IA	IA
213	w	0,4cm	0	0	0	0	1	0	1	0	0	0	1	0	0	0	0	0	0	1	0	1	0	0	0	0	0	0	1	0	0	0	0	0	0	0	0	SSM	0	0	0,3mm	0	< 1/mm2	IA	IA
214	m	0,4cm	0	0	0	0	1	0	0	0	1	0	1	0	0	0	0	0	0	1	0	0	0	1	0	0	0	0	0	0	0	0	0	0	0	0	0	Mucosa	0	0	0,38mm	0	< 1/mm2	IA	IA
215	w	1,5cm	0	0	0	0	1	0	0	0	1	0	0	0	0	1	0	0	1	1	0	1	0	0	0	0	0	0	0	0	0	0	0	0	0	0	0	SSM	0	0	0,35mm	0	< 1/mm2	IA	IA
216	w	1,4cm	0	0	0	0	1	0	0	0	1	1	0	0	0	1	0	0	0	1	0	0	0	1	0	0	0	0	0	0	0	0	0	0	0	0	0	SSM	0	0	0,35mm	0	< 1/mm2	IA	IA
217	m	0,7cm	0	0	0	0	1	0	0	0	1	0	0	0	0	1	0	0	0	1	0	0	0	1	0	0	0	0	0	0	0	0	0	0	0	0	0	SSM	0	0	0,18mm	0	< 1/mm2	IA	IA
218	m	1,5cm	0	0	1	0	0	1	0	0	1	0	1	0	0	0	0	0	0	1	0	0	0	1	1	0	0	1	0	0	0	0	0	0	0	0	0	SSM	0	0	< 1,0mm	0	< 1/mm2	IA	IA
219	m	0,6cm	0	0	0	0	1	0	0	0	1	0	1	0	0	0	0	0	0	1	0	1	0	0	0	0	0	0	0	0	0	0	0	0	0	0	0	SSM	0	0	< 1,0mm	0	< 1/mm2	IA	IA
220	m	1,7cm	0	0	0	1	1	0	1	0	0	0	1	0	0	0	0	0	0	1	0	0	0	1	0	0	0	0	0	0	0	0	0	0	0	0	0	SSM	0	0	< 0,7mm	0	< 1/mm2	IA	IA
221	m	1,8cm	0	0	0	0	1	0	0	0	1	0	0	0	1	1	0	1	0	1	0	1	0	0	0	0	0	0	0	0	0	0	0	0	0	0	0	SSM	0	0	< 0,75mm	0	< 1/mm2	IA	IA
222	m	2,2cm	0	0	0	1	1	0	0	0	1	1	1	0	0	0	0	1	0	1	0	0	0	1	0	0	0	0	0	0	0	0	0	0	0	0	0	SSM	0	0	< 0,75mm	0	< 1/mm2	IA	IA
223	w	0,8cm	0	0	0	1	1	0	0	0	1	0	0	0	1	1	0	1	0	1	0	0	0	1	0	0	0	0	0	0	0	0	0	0	0	0	0	LM	0	0	< 0,75mm	0	< 1/mm2	IA	IA
224	m	1,1cm	0	0	0	1	1	0	0	0	1	0	1	0	0	0	0	0	1	1	0	1	0	0	0	0	0	0	0	0	0	0	0	0	0	0	0	LM	0	0	< 0,75mm	0	< 1/mm2	IA	IA
225	w	1,2cm	0	0	0	0	1	0	1	0	0	0	0	0	1	1	0	0	0	1	0	0	0	1	0	0	0	0	1	0	0	0	0	0	0	0	0	SSM	0	0	< 0,75mm	0	< 1/mm2	IA	IA
226	m	5,3cm	0	0	0	0	1	0	0	0	1	1	0	0	1	1	0	1	0	1	0	1	0	0	0	0	0	0	0	0	0	0	0	0	0	0	0	SSM	0	0	< 0,75mm	0	< 1/mm2	IA	IA
227	m	1,6cm	0	0	0	0	1	0	0	0	1	1	1	0	0	0	0	1	1	1	0	1	0	0	0	0	0	0	0	0	0	0	0	0	0	0	0	SSM	0	0	< 0,6mm	0	< 1/mm2	IA	IA
228	w	1,3cm	0	0	0	1	1	0	1	0	0	0	1	0	0	0	0	0	0	1	0	0	0	1	0	0	0	0	0	0	0	0	0	0	0	0	0	SSM	0	0	< 0,5mm	0	< 1/mm2	IA	IA
229	w	0,4cm	0	0	0	1	1	0	0	0	1	0	0	0	1	1	0	0	0	1	0	0	0	1	0	0	0	0	0	0	0	0	0	0	0	0	0	SSM	0	0	< 0,5mm	0	< 1/mm2	IA	IA
230	m	2,5cm	0	0	1	0	0	0	1	0	0	0	0	0	1	0	0	0	0	1	0	0	0	1	0	0	0	0	0	0	0	0	1	0	0	0	0	LM	0	0	< 0,5mm	0	< 1/mm2	IA	IA
231	w	1,0cm	0	0	0	1	0	0	0	0	1	0	0	0	1	0	0	1	0	1	0	1	0	0	0	0	0	0	0	0	0	0	0	0	0	0	0	SSM	0	0	< 0,5mm	0	< 1/mm2	IA	IA
232	w	1,9cm	0	0	0	0	1	1	0	0	1	0	1	0	0	0	0	0	0	1	0	0	0	1	0	0	0	0	0	0	0	0	0	0	0	0	0	LM	0	0	< 0,5mm	0	0	IA	IA
233	m	0,8cm	0	0	0	1	1	0	0	0	1	0	1	0	0	0	0	1	1	1	0	1	0	0	0	0	0	0	0	0	0	0	0	0	0	0	0	SSM	0	0	< 0,5mm	0	< 1/mm2	IA	IA
234	m	0,5cm	0	0	0	0	1	0	1	0	0	0	1	0	0	0	0	1	0	1	0	1	0	0	0	0	0	0	0	0	0	0	0	0	0	0	0	SSM	0	0	< 0,5mm	0	< 1/mm2	IA	IA
235	w	0,9cm	0	0	0	1	1	0	0	1	0	1	0	0	1	1	0	0	0	1	0	0	0	1	0	0	0	0	0	0	0	0	0	0	0	0	0	SSM	0	0	< 0,5mm	0	< 1/mm2	IA	IA
236	m	0,6cm	0	0	1	0	0	0	0	0	1	1	1	0	0	0	0	0	0	1	0	0	0	1	0	0	0	0	0	0	0	0	0	0	0	0	0	SSM	0	0	< 0,5mm	0	< 1/mm2	IA	IA
237	m	2,1cm	0	0	0	1	0	0	0	0	1	0	1	0	0	0	0	0	0	1	0	0	0	1	0	0	0	0	0	0	0	0	0	0	0	0	0	SSM	0	0	< 0,5mm	0	< 1/mm2	IA	IA
238	w	1,6cm	0	0	1	0	0	0	0	0	1	1	0	0	1	0	0	0	0	1	0	1	0	0	0	0	0	0	0	0	0	0	0	0	0	0	0	SSM	0	0	< 0,5mm	0	< 1/mm2	IA	IA
239	m	0,9cm	0	0	0	0	1	0	0	0	1	0	1	0	0	0	0	0	1	1	0	0	0	1	0	0	0	0	0	0	0	0	0	0	0	0	0	LM	0	0	< 0,5mm	0	< 1/mm2	IA	IA
240	w	1,1cm	0	0	0	1	1	0	0	0	1	1	1	0	0	0	0	0	1	1	0	1	0	0	0	0	0	1	0	0	0	0	0	0	0	0	0	SSM	0	0	< 0,5mm	0	< 1/mm2	IA	IA
241	m	0,9cm	0	0	0	1	1	0	0	0	1	1	1	0	0	0	0	0	0	1	0	0	0	1	0	0	0	0	0	0	0	0	0	0	0	0	0	SSM	0	0	< 0,5mm	0	< 1/mm2	IA	IA
242	w	0,8cm	0	0	0	1	1	0	0	0	1	0	1	0	0	0	0	0	0	1	0	1	0	0	0	0	0	0	0	0	0	0	0	0	0	0	0	SSM	0	0	< 0,5mm	0	< 1/mm2	IA	IA
243	w	1,5cm	0	0	1	0	0	0	0	0	1	1	0	0	1	0	0	0	0	1	0	1	0	0	0	0	0	0	0	0	0	0	0	0	0	0	0	SSM	0	0	< 0,2mm	0	< 1/mm2	IA	IA
244	w	1,2cm	0	1	0	0	1	0	0	0	1	1	0	0	1	1	0	0	0	1	0	0	0	1	1	0	0	0	0	0	0	0	0	0	0	0	0	SSM	0	0	< 0,2mm	0	< 1/mm2	IA	IA
245	w	1,6cm	0	0	0	0	1	0	0	0	1	0	1	0	0	0	0	0	0	1	0	1	0	0	0	0	0	0	0	0	0	0	0	0	0	0	0	SSM	0	0	< 0,2mm	0	< 1/mm2	IA	IA
246	m	0,7cm	0	0	0	1	1	0	0	0	1	0	0	0	1	1	0	0	0	1	0	1	0	0	0	0	0	0	1	0	0	0	0	0	0	0	0	SSM	0	0	< 0,2mm	0	< 1/mm2	IA	IA
247	w	1,3cm	0	0	0	1	0	0	0	0	1	0	1	0	0	0	0	0	0	1	0	1	0	0	0	0	0	0	1	0	0	0	0	0	0	0	0	SSM	0	0	< 0,2mm	0	< 1/mm2	IA	IA
248	m	1,9cm	0	0	0	0	1	0	0	0	1	0	1	0	0	0	0	1	0	1	0	1	0	0	0	0	0	1	0	0	0	0	0	0	0	0	0	SSM	0	0	< 0,5mm	0	< 1/mm2	IA	IA
249	m	0,7cm	0	0	0	0	1	0	0	0	1	0	0	0	1	1	0	0	0	1	0	0	0	1	0	0	0	0	0	0	0	0	0	0	0	0	0	SSM	0	0	0,8mm	0	< 1/mm2	IA	IA
250	w	2,5cm	0	0	1	0	0	0	0	0	1	0	1	0	0	0	0	0	1	0	1	1	0	0	0	0	0	1	0	0	0	0	0	0	0	0	0	SSM	0	0	0,8mm	0	< 1/mm2	IA	IA
251	w	1,9cm	1	1	1	0	0	0	1	0	0	0	1	0	0	0	0	0	0	0	1	1	0	0	0	0	0	0	0	0	0	0	1	0	0	0	0	LM	0	0	0,75mm	0	< 1/mm2	IA	IA
252	m	1,2cm	1	1	0	0	1	0	1	0	0	0	1	0	0	0	0	0	0	0	1	0	0	1	0	0	0	1	0	0	0	0	0	0	0	0	0	SSM	0	0	0,18mm	0	< 1/mm2	IA	IA
253	m	1,5cm	0	0	1	0	0	0	0	0	1	0	1	0	0	0	0	0	0	0	1	1	0	0	0	0	0	0	0	0	0	0	0	0	0	0	0	LM	0	0	< 0,75mm	0	< 1/mm2	IA	IA
254	m	1,3cm	1	1	0	0	1	0	0	0	1	0	1	0	0	0	0	0	0	0	1	1	0	0	0	0	0	0	0	0	0	0	0	0	0	0	0	SSM	0	0	< 0,75mm	0	< 1/mm2	IA	IA
255	w	2,8cm	0	0	0	1	1	0	1	0	0	0	1	0	0	0	0	1	1	0	1	0	0	1	0	0	0	1	0	1	0	0	1	0	0	0	0	LMM	0	0	< 0,5mm	0	< 1/mm2	IA	IA
256	w	1,1cm	0	0	0	0	1	0	0	0	1	1	0	0	1	1	0	1	0	0	1	0	0	1	1	0	0	0	0	0	0	0	0	0	0	0	0	SSM	0	0	< 0,5mm	0	< 1/mm2	IA	IA
257	m	0,7cm	0	0	0	0	1	0	0	0	1	0	0	0	1	1	0	1	0	0	1	0	0	1	0	0	0	1	0	0	0	0	0	0	0	0	0	SSM	0	0	< 0,5mm	0	< 1/mm2	IA	IA
258	m	0,7cm	0	0	0	1	1	0	0	0	1	0	1	0	0	0	0	1	0	0	1	1	0	0	0	0	0	1	0	0	0	0	0	0	0	0	0	LM	0	0	< 0,5mm	0	< 1/mm2	IA	IA
259	w	1,3cm	0	0	0	0	1	0	1	0	0	0	1	0	0	0	0	1	0	0	1	1	0	0	0	0	0	0	0	0	0	0	0	0	0	0	0	SSM	0	0	< 0,5mm	0	< 1/mm2	IA	IA
260	w	2,0cm	0	0	1	0	0	0	1	0	0	0	1	0	0	0	0	0	0	0	1	1	0	0	0	0	0	0	0	0	1	1	1	0	0	0	0	LM	0	0	< 0,5mm	0	0	IA	IA
261	w	1,0cm	0	0	1	0	0	0	0	0	1	0	0	0	0	1	0	1	0	0	1	1	0	0	0	0	0	0	0	0	0	0	0	0	0	0	0	SSM	0	0	< 0,5mm	0	< 1/mm2	IA	IA
262	w	1,0cm	0	0	0	0	1	0	1	0	0	0	0	0	0	1	0	0	0	0	1	0	0	1	0	0	0	1	0	0	0	0	0	0	0	0	0	SSM	0	0	< 0,5mm	0	< 1/mm2	IA	IA
263	m	2,1cm	0	0	0	1	1	0	1	0	0	0	1	0	0	0	0	1	1	0	1	1	0	0	0	0	0	1	0	0	0	0	0	0	0	0	0	SSM	0	0	< 0,5mm	0	< 1/mm2	IA	IA
264	m	5,1cm	1	1	0	1	1	0	1	0	0	0	1	0	0	0	0	0	0	0	1	0	0	1	0	0	0	1	0	0	0	0	0	0	0	0	0	SSM	1	0	< 0,5mm	0	< 1/mm2	IA	IA
265	w	0,5cm	0	0	1	0	0	0	1	0	0	0	0	0	1	1	0	0	0	0	1	0	0	1	0	0	0	0	0	0	0	0	0	0	0	0	0	SSM	0	0	< 0,5mm	0	< 1/mm2	IA	IA
266	m	0,5cm	0	0	0	1	1	0	1	0	0	0	1	0	0	0	0	0	1	0	1	1	0	0	0	0	0	1	0	0	0	0	0	0	0	0	0	SSM	0	0	< 0,5mm	0	< 1/mm2	IA	IA
267	m	1,8cm	0	0	0	0	1	0	1	0	0	0	1	0	0	0	0	1	1	0	1	1	0	0	0	0	0	1	0	0	0	0	0	0	0	0	0	SSM	0	0	< 0,2mm	0	< 1/mm2	IA	IA
268	w	1,3cm	0	0	0	1	1	0	1	0	0	0	0	0	0	1	0	0	0	0	1	1	0	0	0	0	1	0	0	0	0	0	0	0	0	0	0	LM	0	0	< 0,2mm	0	< 1/mm2	IA	IA
269	w	2,0cm	0	0	0	1	1	1	0	0	1	0	1	0	0	0	0	0	0	1	1	0	0	1	0	0	1	0	0	0	0	0	0	0	0	0	0	SSM	0	0	0,85mm	0	< 1/mm2	IA	IA
270	m	7,0cm	1	1	1	0	0	0	1	0	0	0	1	0	0	0	0	0	0	1	1	1	0	0	0	0	0	1	0	0	1	1	0	0	0	0	0	LM	0	0	< 0,75mm	0	< 1/mm2	IA	IA
271	w	1,1cm	0	0	1	0	0	0	0	0	1	1	0	0	1	1	0	0	0	1	1	0	0	1	0	0	0	0	0	0	0	0	0	0	0	0	0	SSM	0	0	< 0,75mm	0	< 1/mm2	IA	IA
272	m	2,1cm	0	0	0	1	1	0	0	0	1	0	0	0	1	1	0	1	0	1	1	1	0	0	0	0	0	1	0	0	0	0	0	0	0	0	0	SSM	0	0	< 0,5mm	0	< 1/mm2	IA	IA
273	m	1,4cm	0	0	0	1	1	0	0	0	1	1	0	0	1	0	0	0	0	1	1	0	0	1	0	0	0	1	0	0	0	0	0	0	0	0	0	SSM	0	0	< 0,5mm	0	< 1/mm2	IA	IA
274	m	0,8cm	0	0	1	0	0	0	0	0	1	0	0	0	1	0	0	0	0	1	1	0	0	1	1	0	1	0	0	0	0	0	0	0	0	0	0	SSM	0	0	< 0,5mm	0	< 1/mm2	IA	IA
275	m	1,6cm	0	0	0	1	1	0	0	0	1	0	0	0	1	0	0	0	0	1	1	0	0	1	0	0	0	1	0	0	0	0	0	0	0	0	0	SSM	0	0	< 0,5mm	0	< 1/mm2	IA	IA
276	m	2,1cm	1	1	1	0	0	0	0	0	1	1	1	0	0	0	1	0	1	0	0	0	0	1	0	0	0	0	0	0	0	0	0	0	0	0	0	SSM	0	0	1mm	0	< 1/mm2	IA	IA
277	w	2,3cm	1	1	0	0	1	1	0	0	1	0	0	0	1	1	1	0	0	0	0	1	0	0	0	0	0	1	0	0	0	0	0	0	0	0	0	SSM	0	0	0,95mm	0	< 1/mm2	IA	IA
278	w	0,7cm	0	0	1	0	0	0	0	0	1	1	0	0	0	1	1	0	0	0	0	1	0	0	0	0	0	0	0	0	0	0	0	0	0	0	0	SSM	0	0	0,8mm	0	< 1/mm2	IA	IA
279	w	1,5cm	0	0	1	0	0	0	0	0	1	1	0	0	1	0	1	0	0	0	0	0	0	1	0	0	0	0	0	0	0	0	0	0	0	0	0	SSM	0	0	0,7mm	0	< 1/mm2	IA	IA
280	w	1,5cm	0	0	1	0	0	0	0	0	1	0	1	0	0	0	1	1	0	0	0	1	0	0	0	0	1	0	0	0	0	0	0	0	0	0	0	SSM	0	0	0,7mm	0	< 1/mm2	IA	IA
281	m	0,8cm	0	0	1	0	0	0	0	0	1	1	0	0	1	0	1	0	0	0	0	0	0	1	0	0	0	1	1	0	0	0	0	0	0	0	0	SSM	0	0	0,6mm	0	< 1/mm2	IA	IA
282	m	0,6cm	0	0	0	0	1	0	0	0	1	0	0	0	0	1	1	0	1	0	0	1	0	0	0	0	0	0	0	0	0	0	0	0	0	0	0	SSM	0	0	0,5mm	0	< 1/mm2	IA	IA
283	m	1,2cm	0	0	0	1	1	0	0	0	1	0	1	0	0	0	1	0	0	0	0	1	0	0	0	0	0	0	0	0	0	0	0	0	0	0	0	SSM	0	0	0,5mm	0	< 1/mm2	IA	IA
284	m	2,4cm	0	0	0	1	1	0	1	0	0	0	1	0	0	0	1	0	1	0	0	1	0	0	0	0	0	0	0	1	1	1	0	0	0	0	0	LM	0	0	0,5mm	0	< 1/mm2	IA	IA
285	m	1,8cm	0	0	1	0	0	0	1	0	0	0	1	0	0	0	1	0	0	0	0	1	0	0	0	0	0	0	0	1	1	1	1	0	0	0	0	SSM	0	0	0,3mm	0	< 1/mm2	IA	IA
286	w	1,1cm	0	0	0	0	1	0	0	0	1	0	1	0	0	0	1	0	0	0	0	1	0	0	0	0	0	0	0	0	0	0	0	0	0	0	0	LM	0	0	0,38mm	0	< 1/mm2	IA	IA
287	w	1,1cm	0	0	1	0	0	0	1	0	0	0	1	0	0	0	1	0	1	0	0	1	0	0	0	0	0	1	0	0	0	0	0	0	0	0	0	SSM	0	0	< 0,5mm	0	< 1/mm2	IA	IA
288	w	1,2cm	0	0	1	0	0	0	0	0	1	0	0	0	1	0	1	1	0	0	0	0	0	1	0	0	0	0	0	0	0	0	0	0	0	0	0	SSM	0	0	< 0,5mm	0	< 1/mm2	IA	IA
289	m	0,4cm	0	0	1	0	0	0	0	0	1	0	0	0	1	0	1	0	0	0	0	1	0	0	0	0	0	0	0	1	0	0	1	0	0	0	0	LM	0	0	< 0,5mm	0	< 1/mm2	IA	IA
290	w	1,1cm	1	1	0	1	1	0	0	0	1	0	0	0	1	0	1	0	0	0	0	1	0	0	0	0	0	1	0	0	0	0	0	0	0	0	0	SSM	0	0	< 0,5mm	0	< 1/mm2	IA	IA
291	m	2,5cm	0	0	1	0	0	0	0	0	1	1	1	0	0	0	1	0	1	0	0	0	0	1	0	0	0	0	0	0	1	1	1	0	0	0	0	LM	0	0	< 0,25mm	0	< 1/mm2	IA	IA
292	m	1,1cm	0	0	1	0	0	0	1	0	0	0	1	0	0	0	1	1	1	0	0	1	0	0	0	0	0	1	0	0	0	0	0	0	0	0	0	NM	0	0	0,5mm	0	< 1/mm2	IA	IA
293	m	1,0cm	0	0	1	0	0	0	1	0	0	0	0	0	1	0	1	0	0	1	0	0	0	1	0	0	0	1	0	0	0	0	0	0	0	0	0	SSM	0	0	0,97mm	0	< 1/mm2	IA	IA
294	w	0,9cm	0	0	1	0	0	0	0	0	1	0	0	0	0	1	1	0	0	1	0	0	0	1	0	0	0	0	0	0	0	0	0	0	0	0	0	SSM	0	0	0,8mm	0	0	IA	IA
295	w	2,1cm	0	0	0	0	1	0	0	0	1	0	0	0	1	1	1	0	0	1	0	0	0	1	0	0	0	1	0	0	0	0	0	0	0	0	0	SSM	0	0	0,75mm	0	> 1/mm2	IA	IA
296	w	1,3cm	0	0	0	1	1	0	0	0	1	0	0	0	1	0	1	0	0	1	0	0	0	1	0	0	0	0	0	0	0	0	0	0	0	0	0	SSM	0	0	0,6mm	0	< 1/mm2	IA	IA
297	w	1,5cm	0	0	0	0	1	0	1	0	0	0	0	0	1	1	1	0	0	1	0	1	0	0	0	0	0	0	0	0	0	0	0	0	0	0	0	SSM	0	0	0,65mm	0	0	IA	IA
298	w	1,5cm	0	0	1	0	0	1	1	0	0	0	1	0	0	0	1	0	0	1	0	0	0	1	0	0	1	0	0	0	0	0	0	0	0	0	0	SSM	0	0	0,5mm	0	< 1/mm2	IA	IA
299	m	1,0cm	0	0	1	0	0	0	0	0	1	1	0	0	0	1	1	0	0	1	0	0	0	1	0	0	0	0	0	0	0	0	0	0	0	0	0	SSM	0	0	0,5mm	0	< 1/mm2	IA	IA
300	m	1,3cm	0	0	0	1	1	0	0	0	1	0	1	0	0	0	1	0	0	1	0	0	0	1	0	0	0	0	0	0	0	0	0	0	0	0	0	SSM	0	0	0,4mm	0	< 1/mm2	IA	IA
301	m	2,5cm	0	0	1	0	0	0	0	0	1	1	1	0	0	0	1	1	1	1	0	1	0	0	0	0	0	0	0	0	0	0	0	0	0	0	0	SSM	0	0	< 0,75mm	0	0	IA	IA
302	m	1,1cm	0	0	0	0	1	0	0	0	1	1	1	0	0	0	1	0	0	1	0	0	0	1	0	0	1	0	1	0	0	0	0	0	0	0	0	SSM	0	0	< 0,5mm	0	< 1/mm2	IA	IA
303	w	2,0cm	0	0	1	0	0	0	0	0	1	1	1	0	0	0	1	0	0	1	0	1	0	0	0	0	0	0	0	0	0	0	0	0	0	0	0	SSM	0	0	< 0,5mm	0	< 1/mm2	IA	IA
304	m	1,3cm	1	1	1	0	0	0	1	0	0	0	1	0	0	0	1	0	0	1	0	0	0	1	0	0	0	1	0	0	0	0	0	0	0	0	0	SSM	0	0	< 0,5mm	0	< 1/mm2	IA	IA
305	w	1,3cm	0	0	0	0	1	0	0	0	1	0	0	0	1	1	1	0	0	1	0	1	0	0	0	0	0	0	1	0	0	0	0	0	0	0	0	SSM	0	0	< 0,5mm	0	< 1/mm2	IA	IA
306	w	1,1cm	1	1	1	0	0	0	1	0	0	0	1	0	0	0	1	0	0	1	0	0	0	1	0	0	0	0	1	0	0	0	0	0	0	0	0	SSM	0	0	< 0,5mm	0	< 1/mm2	IA	IA
307	w	0,9cm	0	0	0	1	1	0	0	0	1	1	1	0	0	0	1	0	0	1	0	0	0	1	0	0	0	0	0	0	0	0	0	0	0	0	0	SSM	0	0	< 0,5mm	0	< 1/mm2	IA	IA
308	w	1,8cm	0	0	1	0	0	0	0	0	1	0	0	0	1	1	1	1	0	0	1	0	0	1	0	0	1	0	0	0	0	0	0	0	0	0	0	SSM	0	0	0,7mm	0	< 1/mm2	IA	IA
309	m	0,9cm	0	0	0	1	1	0	1	0	0	0	1	0	0	0	1	0	0	0	1	1	0	0	0	0	0	1	0	0	0	0	0	0	0	0	0	SSM	0	0	0,6mm	0	< 1/mm2	IA	IA
310	w	1,4cm	0	0	1	0	0	0	0	0	1	0	1	0	0	0	1	0	0	0	1	1	0	0	0	0	0	0	0	0	0	0	0	0	0	0	1	ALM	0	0	0,3mm	0	< 1/mm2	IA	IA
311	m	1,7cm	1	1	1	0	0	0	0	0	1	0	1	0	0	0	1	1	0	0	1	1	0	0	0	0	0	0	0	0	0	0	0	0	0	0	0	ALM	0	0	< 0,75mm	0	< 1/mm2	IA	IA
312	w	3,2cm	1	1	0	0	1	0	1	0	0	0	1	0	0	0	1	0	1	0	1	1	0	0	0	0	0	0	0	0	0	0	0	0	0	0	0	SSM	0	0	< 0,5mm	0	< 1/mm2	IA	IA
313	m	2,7cm	1	1	1	0	0	0	1	0	0	0	1	0	0	0	1	0	0	0	1	1	0	0	0	0	0	1	0	0	0	0	0	0	0	0	0	SSM	1	0	< 0,5mm	0	< 1/mm2	IA	IA
314	m	1,1cm	0	0	0	1	1	0	0	0	1	1	1	0	0	0	1	0	0	0	1	1	0	0	0	0	0	1	0	0	0	0	0	0	0	0	0	SSM	1	0	< 0,5mm	0	< 1/mm2	IA	IA
315	m	1,3cm	0	0	0	1	0	0	0	0	1	1	1	0	0	0	1	1	0	1	1	0	0	1	1	0	0	1	1	0	0	0	0	0	0	0	0	SSM	0	0	< 0,75mm	0	< 1/mm2	IA	IA
316	m	1,4cm	0	0	0	1	1	0	0	0	1	0	1	0	0	0	1	1	0	1	1	1	0	0	0	0	0	0	0	0	0	0	0	0	0	0	0	SSM	0	0	< 0,75mm	0	< 1/mm2	IA	IA
317	m	2,7cm	0	0	0	1	1	0	1	0	0	0	1	0	0	0	1	0	0	1	1	1	0	0	0	0	0	0	0	0	0	0	0	0	0	0	0	SSM	0	0	< 0,5mm	0	< 1/mm2	IA	IA
318	m	0,6cm	0	0	1	0	0	0	0	0	1	0	1	0	0	0	0	0	0	0	0	1	0	0	0	0	0	1	0	0	0	0	0	0	0	0	0	SSM	0	0	0,9mm	0	< 1/mm2	IA
319	m	0,5cm	0	0	1	0	0	0	0	0	1	0	1	0	0	0	0	0	0	0	0	0	0	1	0	0	0	0	0	0	0	0	0	0	0	0	0	SSM	0	0	0,8mm	0	< 1/mm2	IA
320	m	0,6cm	0	0	1	0	0	0	1	0	0	0	1	0	0	0	0	0	0	0	0	1	0	0	0	0	0	0	0	0	0	0	0	0	0	0	0	LM	0	0	0,85mm	0	< 1/mm2	IA
321	m	1,6cm	0	0	0	1	1	0	0	0	1	1	0	0	1	0	0	0	0	0	0	0	0	1	1	0	0	0	0	0	0	0	0	0	0	0	0	SSM	0	0	0,7mm	0	< 1/mm2	IA
322	m	1,1cm	0	0	1	0	0	0	0	0	1	1	0	0	1	0	0	0	0	0	0	0	0	1	0	0	0	0	0	0	0	0	0	0	0	0	0	SSM	0	0	0,7mm	0	< 1/mm2	IA
323	m	0,5cm	0	0	0	0	1	0	1	0	0	0	1	0	0	0	0	1	0	0	0	1	0	0	0	0	0	0	0	0	0	0	0	0	0	0	0	SSM	0	0	0,7mm	0	0	IA
324	w	2,0cm	0	0	0	0	1	0	0	0	1	0	0	0	1	1	0	1	1	0	0	1	0	0	0	0	0	0	0	0	0	0	0	0	0	0	0	SSM	0	0	0,7mm	0	< 1/mm2	IA
325	w	2,5cm	1	1	1	0	0	0	0	0	1	0	1	0	0	0	0	1	0	0	0	0	0	1	0	0	0	1	0	0	0	0	0	0	0	0	1	ALM	1	0	0,7mm	0	< 1/mm2	IA
326	m	1,4cm	0	0	1	0	0	0	1	0	0	0	0	0	1	0	0	0	0	0	0	0	0	1	0	0	0	0	0	0	1	1	1	0	0	0	0	LM	0	0	0,75mm	0	< 1/mm2	IA
327	w	2,4cm	1	1	1	0	0	0	1	0	0	0	1	0	0	0	0	0	0	0	0	1	0	0	0	0	0	0	0	0	0	0	0	0	0	1	1	ALM	0	0	0,6mm	0	< 1/mm2	IA
328	m	1,9cm	0	0	0	0	1	0	0	0	1	1	0	0	1	1	0	0	0	0	0	1	0	0	0	0	1	0	0	0	0	0	0	0	0	0	0	SSM	0	0	0,6mm	0	< 1/mm2	IA
329	m	1,3cm	0	0	0	1	1	0	1	0	0	0	1	0	0	0	0	0	1	0	0	1	0	0	0	0	0	0	0	0	0	0	0	0	0	0	0	SSM	0	0	0,6mm	0	< 1/mm2	IA
330	w	1,5cm	0	0	1	0	0	0	1	0	0	0	0	0	1	1	0	0	0	0	0	0	0	1	0	0	0	0	0	0	0	0	0	0	0	0	0	LM	0	0	0,6mm	0	< 1/mm2	IA
331	w	0,6cm	0	0	1	0	0	0	1	0	0	0	0	0	1	1	0	0	0	0	0	0	0	1	0	0	0	0	0	0	0	0	0	0	0	0	0	SSM	0	0	0,6mm	0	< 1/mm2	IA
332	m	0,6cm	0	0	0	1	1	0	0	0	1	0	0	0	1	0	0	0	0	0	0	0	0	1	0	0	0	0	0	0	0	0	0	0	0	0	0	SSM	0	0	0,62mm	0	< 1/mm2	IA
333	m	0,9cm	0	0	0	0	1	0	1	0	0	0	1	0	0	0	0	1	0	0	0	1	0	0	0	0	0	1	0	0	0	0	0	0	0	0	0	SSM	0	0	0,5mm	0	< 1/mm2	IA
334	w	0,7cm	0	0	1	0	0	0	1	0	0	0	1	0	0	0	0	0	0	0	0	1	0	0	0	0	0	0	0	1	0	1	1	0	0	0	0	LM	0	0	0,5mm	0	< 1/mm2	IA
335	m	1,4cm	0	0	1	0	0	0	1	0	0	0	1	0	0	0	0	0	0	0	0	1	0	0	0	0	0	1	0	0	0	0	1	0	0	0	0	LM	0	0	0,5mm	0	< 1/mm2	IA
336	w	0,9cm	0	0	1	0	0	0	1	0	0	0	1	0	0	0	0	0	0	0	0	1	0	0	0	0	0	1	0	0	0	0	0	0	0	0	0	LM	0	0	0,55mm	0	< 1/mm2	IA
337	w	0,6cm	0	0	1	0	0	0	0	0	1	1	1	0	0	0	0	0	0	0	0	0	0	1	0	0	0	0	0	0	0	0	0	0	0	0	0	SSM	0	0	0,52mm	0	< 1/mm2	IA
338	w	1,0cm	0	0	1	0	0	0	1	0	0	0	0	0	1	0	0	0	1	0	0	1	0	0	0	0	0	0	0	1	1	1	1	0	0	0	0	LM	0	0	0,4mm	0	< 1/mm2	IA
339	w	1,0cm	0	0	1	0	0	0	1	0	0	0	0	0	1	0	0	0	0	0	0	0	0	1	0	0	0	0	0	0	0	0	0	0	0	0	0	ALM	0	0	0,4mm	0	< 1/mm2	IA
340	w	0,9cm	0	0	1	0	0	0	1	0	0	0	1	0	0	0	0	0	0	0	0	1	0	0	0	0	0	0	0	0	0	0	0	0	0	0	0	LM	0	0	0,3mm	0	< 1/mm2	IA
341	w	1,0cm	0	0	0	0	1	0	0	0	1	0	1	0	0	0	0	0	1	0	0	1	0	0	0	0	0	0	0	0	0	0	0	0	0	0	0	SSM	0	0	0,3mm	0	< 1/mm2	IA
342	w	1,0cm	0	0	0	1	1	0	0	0	1	1	1	0	0	0	0	0	0	0	0	1	0	0	0	0	0	0	0	0	0	0	0	0	0	0	0	SSM	0	0	0,3mm	0	< 1/mm2	IA
343	w	2,5cm	0	0	1	0	0	0	0	0	1	0	1	0	0	0	0	0	0	0	0	1	0	0	0	0	0	1	0	0	0	0	0	0	0	0	0	SSM	0	0	0,38mm	0	< 1/mm2	IA
344	m	2,0cm	0	0	0	1	1	1	0	0	1	0	0	0	1	1	0	0	0	0	0	0	0	1	0	0	0	0	0	0	0	0	0	0	0	0	0	SSM	0	0	0,38mm	0	< 1/mm2	IA
345	w	1,5cm	0	0	0	0	1	0	1	0	0	0	1	0	0	0	0	1	0	0	0	1	0	0	0	0	0	0	0	0	0	0	0	0	0	0	0	SSM	0	0	0,35mm	0	< 1/mm2	IA
346	w	1,5cm	0	0	1	0	0	0	0	0	1	1	0	0	1	1	0	0	1	0	0	1	0	0	0	0	0	0	0	0	0	0	1	0	0	0	0	LM	0	0	0,2mm	0	< 1/mm2	IA
347	m	0,9cm	0	0	1	0	0	0	1	0	0	0	1	0	0	0	0	0	0	0	0	1	0	0	0	0	0	0	0	1	0	0	1	0	0	0	0	LM	0	0	0,2mm	0	< 1/mm2	IA
348	w	0,8cm	0	0	1	0	0	0	1	0	0	0	1	0	0	0	0	0	0	0	0	1	0	0	0	0	0	0	0	0	1	1	0	0	0	0	0	LM	0	0	0,2mm	0	< 1/mm2	IA
349	w	1,2cm	0	0	1	0	0	0	0	0	1	1	1	0	0	0	0	0	1	0	0	1	0	0	0	0	0	1	0	0	0	0	0	0	0	0	0	SSM	0	0	0,28mm	0	< 1/mm2	IA
350	m	1,0cm	0	0	0	0	1	0	1	0	0	0	1	0	0	0	0	1	0	0	0	1	0	0	0	0	0	0	0	0	0	0	0	0	0	0	0	SSM	0	0	0,25mm	0	< 1/mm2	IA
351	m	0,7cm	0	0	1	0	0	0	1	0	0	0	1	0	0	0	0	0	0	0	0	1	0	0	0	0	0	0	0	0	0	0	1	0	0	0	0	LM	0	0	0,25mm	0	< 1/mm2	IA
352	w	1,9cm	0	0	1	0	0	0	1	0	0	0	1	0	0	0	0	0	0	0	0	1	0	0	0	0	0	0	0	0	1	1	1	0	0	0	0	LM	0	0	0,25mm	0	< 1/mm2	IA
353	m	1,0cm	0	0	0	0	1	0	0	0	1	1	1	0	0	0	0	0	0	0	0	1	0	0	0	0	0	0	0	0	0	0	0	0	0	0	0	SSM	0	0	0,18mm	0	< 1/mm2	IA
354	m	2,0cm	0	0	0	0	1	0	1	0	0	0	0	0	1	1	0	0	0	0	0	1	0	0	0	0	0	0	0	0	0	0	1	0	0	0	0	SSM	0	0	0,18mm	0	< 1/mm2	IA
355	w	1,2cm	0	0	1	0	0	0	1	0	0	0	1	0	0	0	0	0	0	0	0	1	0	0	0	0	0	0	0	1	0	1	1	0	0	0	0	LM	0	0	0,15mm	0	< 1/mm2	IA
356	m	0,6cm	0	0	1	0	0	0	1	0	0	0	1	0	0	0	0	0	0	0	0	1	0	0	0	0	0	0	0	0	0	0	0	0	0	0	0	LM	0	0	0,15mm	0	< 1/mm2	IA
357	w	0,3cm	0	0	0	1	1	0	1	0	0	0	1	0	0	0	0	0	0	0	0	1	0	0	0	0	0	0	0	0	0	0	0	0	0	0	0	SSM	0	0	0,15mm	0	< 1/mm2	IA
358	w	2,3cm	0	0	1	0	0	0	0	0	1	0	1	0	0	0	0	0	0	0	0	0	0	1	0	0	0	0	0	0	0	0	1	0	0	0	0	LM	0	0	> 0,5mm	0	< 1/mm2	IA
359	w	1,1cm	0	0	1	0	0	0	0	0	1	0	1	0	0	0	0	1	1	0	0	0	0	1	0	0	0	1	0	0	0	0	0	0	0	0	0	SSM	0	0	< 1,0mm	0	0	IA
360	m	2,5cm	0	0	0	0	1	0	1	0	0	0	1	0	0	0	0	0	1	0	0	0	0	1	0	0	0	0	0	0	0	0	0	0	0	0	0	LM	0	0	< 0,75mm	0	< 1/mm2	IA
361	m	0,3cm	0	0	1	0	0	0	0	0	1	0	0	0	1	1	0	0	0	0	0	1	0	0	0	0	0	0	0	0	0	0	0	0	0	0	0	LM	0	0	< 0,75mm	0	< 1/mm2	IA
362	m	0,8cm	0		1	0	0	0	0	0	1	0	1	0	0	0	0	0	0	0	0	1	0	0	0	0	0	1	0	0	0	0	0	0	0	0	0	SSM	0	0	< 0,75mm	0	< 1/mm2	IA
363	w			0	0	0	1	0	0	0	1	0	1	0	0	0	0	0	0	0	0	0	0	1	0	0	0	0	0	0	0	0	0	0	0	0	0	SSM	0	0	< 0,75mm	1	0	IA
364	m	1,2cm	0	0	0	0	1	0	0	0	1	0	0	0	0	1	0	0	0	0	0	0	0	1	0	0	0	0	0	0	0	0	0	0	0	0	0	SSM	0	0	< 0,75mm	0	< 1/mm2	IA
365	m	0,8cm	0	0	0	1	0	1	0	0	1	0	1	0	0	0	0	0	0	0	0	1	0	0	0	0	0	0	0	0	0	0	0	0	0	0	0	SSM	0	0	< 0,75mm	0	< 1/mm2	IA
366	m	0,9cm	0	0	0	1	1	0	1	0	0	0	0	0	0	1	0	1	0	0	0	1	0	0	0	0	0	0	0	0	0	0	0	0	0	0	0	SSM	0	0	< 0,75mm	0	< 1/mm2	IA
367	w	2,0cm	0	0	0	0	1	0	0	0	1	0	1	0	0	0	0	1	0	0	0	1	0	0	0	0	0	0	0	0	0	0	0	0	0	0	0	SSM	0	0	< 0,75mm	0	< 1/mm2	IA
368	m	1,7cm	0	0	1	0	0	0	1	0	0	0	1	0	0	0	0	0	0	0	0	0	0	1	0	0	0	0	0	1	1	1	1	0	0	0	0	LM	0	0	< 0,75mm	0	< 1/mm2	IA
369	w	0,5cm	0	0	1	0	0	0	0	0	1	0	1	0	0	0	0	0	1	0	0	1	0	0	0	0	0	0	0	0	0	0	0	0	0	0	0	SSM	0	0	< 0,6mm	0	< 1/mm2	IA
370	m	0,3cm	0	0	1	0	0	0	0	0	1	0	1	0	0	0	0	1	0	0	0	1	0	0	0	0	0	0	0	0	0	0	0	0	0	0	0	SSM	0	0	< 0,5mm	0	< 1/mm2	IA
371	w	0,5cm	0	0	1	0	0	0	1	0	0	0	1	0	0	0	0	0	0	0	0	1	0	0	0	0	0	0	0	1	1	1	1	0	0	0	0	LM	0	0	< 0,5mm	0	< 1/mm2	IA
372	m	0,7cm	0	0	0	1	1	0	1	0	0	0	1	0	0	0	0	1	0	0	0	1	0	0	0	0	0	0	1	0	0	0	0	0	0	0	0	SSM	0	0	< 0,5mm	0	< 1/mm2	IA
373	w	0,6cm	0	0	0	1	1	0	1	0	0	0	1	0	0	0	0	0	0	0	0	1	0	0	0	0	0	0	0	0	1	1	0	0	0	0	0	SSM	0	0	< 0,5mm	0	< 1/mm2	IA
374	w	1,0cm	0	0	0	1	0	0	0	0	1	0	1	0	0	0	0	1	0	0	0	1	0	0	0	0	0	0	0	0	0	0	0	0	0	0	0	SSM	0	0	< 0,5mm	0	< 1/mm2	IA
375	m	0,4cm	0	0	0	0	1	0	0	0	1	0	1	0	0	0	0	1	0	0	0	1	0	0	0	0	0	1	0	0	0	0	0	0	0	0	0	SSM	0	0	< 0,5mm	0	< 1/mm2	IA
376	w	0,7cm	0	0	0	1	1	0	0	0	1	0	0	0	1	0	0	1	0	0	0	1	0	0	0	0	0	0	0	0	0	0	0	0	0	0	0	SSM	0	0	< 0,5mm	0	< 1/mm2	IA
377	m	0,6cm	0	0	1	0	0	0	0	0	1	0	1	0	0	0	0	0	1	0	0	1	0	0	0	0	0	1	0	0	0	0	0	0	0	0	0	SSM	0	0	< 0,5mm	0	< 1/mm2	IA
378	m	1,4cm	0	0	0	0	1	0	1	0	0	0	1	0	0	0	0	1	1	0	0	1	0	0	0	0	0	0	0	0	0	0	0	0	0	0	0	SSM	0	0	< 0,5mm	0	< 1/mm2	IA
379	w	0,7cm	0	0	0	0	1	0	1	0	0	0	1	0	0	0	0	0	0	0	0	0	0	1	0	0	0	0	0	0	0	0	0	0	0	0	0	SSM	0	0	< 0,5mm	0	< 1/mm2	IA
380	m	3,5cm	0	0	1	0	0	0	0	0	1	1	1	0	0	0	0	1	1	0	0	1	0	0	0	0	0	1	0	1	1	1	1	0	0	0	0	SSM	0	0	< 0,5mm	0	< 1/mm2	IA
381	m	0,6cm	0	0	0	0	1	0	0	0	1	0	1	0	0	0	0	1	0	0	0	0	0	1	0	0	0	0	0	0	0	0	0	0	0	0	0	SSM	0	0	< 0,5mm	0	< 1/mm2	IA
382	w	0,7cm	0	0	0	1	1	0	0	0	1	0	0	0	1	0	0	0	0	0	0	1	0	0	0	0	0	1	0	0	0	0	0	0	0	0	0	SSM	0	0	< 0,5mm	0	< 1/mm2	IA
383	w	2,1cm	0	0	1	0	0	0	1	0	0	0	1	0	0	0	0	1	1	0	0	0	0	1	0	0	0	1	0	0	0	0	0	0	0	0	0	SSM	0	0	< 0,5mm	0	< 1/mm2	IA
384	w	0,3cm	0	0	1	0	0	0	0	0	1	1	1	0	0	0	0	0	1	0	0	0	0	1	0	0	0	0	0	0	0	0	0	0	0	0	0	SSM	0	0	< 0,5mm	0	< 1/mm2	IA
385	w	0,8cm	0	0	1	0	0	0	0	0	1	0	0	0	1	0	0	0	0	0	0	1	0	0	0	0	0	0	0	0	0	0	0	0	0	0	0	SSM	0	0	< 0,5mm	0	< 1/mm2	IA
386	m	0,7cm	0	0	1	0	0	0	1	0	0	0	0	0	0	1	0	0	0	0	0	0	1	0	0	0	0	0	0	0	0	0	0	0	0	0	0	SSM	0	0	< 0,5mm	0	< 1/mm2	IA
387	m	1,2cm	0	0	0	1	1	0	1	0	0	0	0	0	1	0	0	0	0	0	0	0	0	1	0	0	0	0	0	0	0	0	1	0	0	0	0	LMM	0	0	< 0,5mm	0	< 1/mm2	IA
388	w	1,2cm	0	0	1	0	0	0	1	0	0	0	1	0	0	0	0	0	0	0	0	0	0	1	0	0	0	0	0	1	0	0	1	0	0	0	0	LM	0	0	< 0,5mm	0	< 1/mm2	IA
389	m	1,5cm	0	0	0	1	1	0	0	0	1	0	0	0	1	1	0	0	0	0	0	0	0	1	0	0	0	0	0	0	0	0	0	0	0	0	0	LM	0	0	< 0,5mm	0	< 1/mm2	IA
390	w	0,9cm	0	0	1	0	0	0	1	0	0	0	1	0	0	0	0	0	0	0	0	0	0	1	0	0	0	1	0	0	0	0	1	0	0	0	0	SSM	0	0	< 0,5mm	0	< 1/mm2	IA
391	w	1,5cm	0	0	0	0	0	0	1	0	0	0	1	0	0	0	0	0	0	0	0	1	0	0	0	0	0	0	0	0	0	1	1	0	0	0	0	SSM	0	0	< 0,5mm	0	< 1/mm2	IA
392	w	1,2cm	0	0	0	1	1	0	0	0	1	0	1	0	0	0	0	1	0	0	0	1	0	0	0	0	0	1	0	0	0	0	0	0	0	0	0	LM	0	0	< 0,5mm	0	< 1/mm2	IA
393	m	0,4cm	0	0	0	0	1	0	0	0	1	0	0	0	1	1	0	0	1	0	0	1	0	0	0	0	0	0	0	0	0	0	0	0	0	0	0	SSM	0	0	< 0,5mm	0	< 1/mm2	IA
394	m	0,6cm	0	0	0	0	1	0	1	0	0	0	1	0	0	0	0	1	0	0	0	1	0	0	0	0	0	0	0	0	0	0	0	0	0	0	0	SSM	0	0	< 0,5mm	0	< 1/mm2	IA
395	w	1,0cm	0	0	1	0	0	0	1	0	0	0	0	0	1	1	0	1	1	0	0	1	0	0	0	0	0	0	0	0	0	0	0	0	0	0	0	SSM	0	0	< 0,5mm	0	< 1/mm2	IA
396	m	0,7cm	0	0	1	0	0	0	1	0	0	0	1	0	0	0	0	0	0	0	0	0	0	0	0	0	0	0	0	0	0	0	0	0	0	0	0	LM	0	0	< 0,5mm	0	< 1/mm2	IA
397	w	0,9cm	0	0	1	0	0	0	0	0	1	0	1	0	0	0	0	1	0	0	0	0	0	1	0	0	0	0	0	0	0	0	0	0	0	0	0	SSM	0	0	< 0,5mm	0	< 1/mm2	IA
398	m	0,8cm	0	0	0	0	1	0	0	0	1	0	0	0	0	1	0	0	0	0	0	0	0	1	0	0	0	0	0	0	0	0	0	0	0	0	0	SSM	0	0	< 0,5mm	0	< 1/mm2	IA
399	m	0,8cm	0	0	0	0	1	0	0	0	1	0	1	0	0	0	0	0	0	0	0	0	0	1	0	0	0	0	0	0	0	0	0	0	0	0	0	SSM	0	0	< 0,5mm	0	< 1/mm2	IA
400	w	2,0cm	0	0	0	0	1	0	0	0	1	0	0	0	1	1	0	0	0	0	0	0	0	1	0	0	0	0	0	0	0	0	0	0	0	0	0	SSM	0	0	< 0,5mm	0	< 1/mm2	IA
401	m	0,5cm	0	0	0	1	0	0	0	0	1	0	0	0	1	1	0	0	0	0	0	0	0	1	0	0	0	0	0	0	0	0	0	0	0	0	0	SSM	0	0	< 0,5mm	0	< 1/mm2	IA
402	m	0,6cm	0	0	1	0	0	0	0	0	1	0	1	0	0	0	0	0	1	0	0	0	0	1	0	0	0	0	0	0	0	0	0	0	0	0	0	LM	0	0	< 0,5mm	0	< 1/mm2	IA
403	m	1,1cm	0	0	0	1	1	0	0	0	1	0	0	0	1	1	0	0	1	0	0	0	0	1	0	0	0	0	1	1	0	0	1	0	0	0	0	SSM	0	0	< 0,5mm	0	< 1/mm2	IA
404	w	1,6cm	1	1	0	0	1	0	1	0	0	0	1	0	0	0	0	1	0	0	0	1	0	0	0	0	0	0	0	0	0	0	0	0	0	0	0	SSM	0	0	< 0,5mm	0	< 1/mm2	IA
405	m	0,6cm	0	0	1	0	0	0	1	0	0	0	0	0	0	1	0	0	0	0	0	0	1	0	0	0	0	0	1	0	0	0	0	0	0	0	0	SSM	0	0	< 0,5mm	0	< 1/mm2	IA
406	m	1,6cm	0	0	1	0	0	0	0	0	1	0	0	0	0	1	0	1	1	0	0	1	0	0	0	0	0	0	0	0	0	0	0	0	0	0	0	SSM	0	0	< 0,5mm	0	< 1/mm2	IA
407	m	0,7cm	0	0	1	0	0	0	1	0	0	0	1	0	0	0	0	0	0	0	0	0	0	1	0	0	0	0	0	0	0	0	1	0	0	0	0	LM	0	0	< 0,5mm	0	< 1/mm2	IA
408	w	1,4cm	0	0	1	0	0	0	1	0	0	0	1	0	0	0	0	0	0	0	0	1	0	0	0	0	0	0	0	1	1	1	1	0	0	0	0	LM	0	0	< 0,5mm	0	< 1/mm2	IA
409	w	1,4cm	0	0	1	0	0	1	0	0	1	1	0	0	1	1	0	0	0	0	0	0	0	1	0	0	0	0	0	0	0	0	0	0	0	0	0	SSM	0	0	< 0,5mm	0	< 1/mm2	IA
410	m	1,5cm	0	0	1	0	0	0	1	0	0	0	1	0	0	0	0	0	0	0	0	0	0	1	0	0	0	0	0	0	0	0	0	0	0	0	0	LM	0	0	< 0,5mm	0	< 1/mm2	IA
411	m	1,0cm	0	0	1	0	0	0	0	0	1	1	1	0	0	0	0	0	0	0	0	1	0	0	0	0	0	0	0	0	0	0	0	0	0	0	0	SSM	0	0	< 0,5mm	0	< 1/mm2	IA
412	m	1,6cm	0	0	0	1	1	0	1	0	0	0	1	0	0	0	0	0	1	0	0	1	0	0	0	0	0	0	0	0	0	0	0	0	0	0	0	LM	0	0	< 0,5mm	0	< 1/mm2	IA
413	m	2,5cm	0	0	0	1	1	0	1	0	0	0	1	0	0	0	0	1	1	0	0	1	0	0	0	0	0	1	0	0	0	0	1	0	0	0	0	SSM	0	0	< 0,5mm	0	< 1/mm2	IA
414	m	2,4cm	0	0	1	0	0	0	1	0	0	0	1	0	0	0	0	0	0	0	0	0	0	1	0	0	0	0	0	1	1	1	1	0	0	0	0	LM	0	0	< 0,5mm	0	< 1/mm2	IA
415	m	0,4cm	0	0	1	0	0	0	0	0	1	1	1	0	0	0	0	0	0	0	0	1	0	0	0	0	0	0	0	0	0	0	0	0	0	0	0	SSM	0	0	< 0,5mm	0	< 1/mm2	IA
416	w	1,1cm	0	0	0	0	1	0	0	0	1	0	0	0	0	1	0	0	0	0	0	0	0	1	0	0	0	0	0	0	0	0	0	0	0	0	0	SSM	0	0	< 0,5mm	0	< 1/mm2	IA
417	m	0,8cm	0	0	1	0	0	0	0	0	1	0	1	0	0	0	0	0	0	0	0	1	0	0	0	0	0	0	0	0	0	0	1	0	0	0	0	LM	0	0	< 0,5mm	0	< 1/mm2	IA
418	w	4,0cm	0	0	1	0	0	0	1	0	0	0	1	0	0	0	0	0	0	0	0	1	0	0	0	0	0	0	0	0	1	1	1	0	0	0	0	LM	0	0	< 0,5mm	0	< 1/mm2	IA
419	w	0,7cm	0	0	0	0	1	0	0	0	1	0	1	0	0	0	0	0	0	0	0	1	0	0	0	0	0	0	0	0	0	0	0	0	0	0	0	SSM	0	0	< 0,5mm	0	< 1/mm2	IA
420	w	2,0cm	0	0	0	1	1	0	0	0	1	1	1	0	0	0	0	1	1	0	0	1	0	0	0	0	0	1	0	0	0	0	0	0	0	0	0	SSM	0	0	< 0,5mm	0	< 1/mm2	IA
421	w	1,2cm	0	0	1	0	0	0	0	0	1	0	1	0	0	0	0	0	0	0	0	1	0	0	0	0	0	0	0	0	1	1	1	0	0	0	0	LM	0	0	< 0,5mm	0	< 1/mm2	IA
422	w	0,7cm	0	0	0	0	1	0	0	0	1	0	0	0	1	1	0	0	0	0	0	1	0	0	0	0	0	0	0	0	0	0	0	0	0	0	0	SSM	0	0	< 0,5mm	0	< 1/mm2	IA
423	m	1,2cm	0	0	1	0	0	0	1	0	0	0	1	0	0	0	0	1	1	0	0	1	0	0	0	0	0	0	0	0	0	1	0	0	0	0	0	SSM	0	0	< 0,5mm	0	< 1/mm2	IA
424	m	2,3cm	0	0	0	1	1	0	0	0	1	0	1	0	0	0	0	0	0	0	0	1	0	0	0	0	0	0	0	0	0	0	0	0	0	0	0	SSM	0	0	< 0,5mm	0	< 1/mm2	IA
425	w	1,7cm	0	0	0	0	1	0	1	0	0	0	1	0	0	0	0	0	0	0	0	1	0	0	0	0	0	0	0	0	0	0	1	0	0	0	0	LM	0	0	< 0,5mm	0	< 1/mm2	IA
426	m	0,5cm	0	0	1	0	0	0	1	0	0	0	1	0	0	0	0	0	0	0	0	1	0	0	0	0	0	0	0	1	0	0	0	0	0	0	0	LM	0	0	< 0,5mm	0	< 1/mm2	IA
427	w	1,3cm	0	0	1	0	0	0	1	0	0	0	1	0	0	0	0	0	0	0	0	1	0	0	0	0	0	0	0	0	0	1	1	0	0	0	0	LM	0	0	< 0,5mm	0	< 1/mm2	IA
428	m	2,5cm	0	0	1	0	0	0	1	0	0	0	1	0	0	0	0	0	0	0	0	1	0	0	0	0	0	0	0	0	0	1	1	0	0	0	0	LM	0	0	< 0,3mm	0	< 1/mm2	IA
429	m	1,7cm	0	0	1	0	0	0	1	0	0	0	1	0	0	0	0	0	0	0	0	1	0	0	0	0	0	0	0	1	1	1	1	0	0	0	0	LM	0	0	< 0,3mm	0	< 1/mm2	IA
430	m	1,1cm	0	0	0	0	1	0	1	0	0	0	0	0	1	0	0	0	0	0	0	1	0	0	0	0	0	0	0	0	0	0	0	0	0	0	0	LM	0	0	< 0,3mm	0	0	IA
431	m	0,5cm	0	0	0	0	1	0	0	0	1	0	1	0	0	0	0	1	0	0	0	1	0	0	0	0	0	0	0	0	0	0	1	0	0	0	0	SSM	0	0	< 0,3mm	0	< 1/mm2	IA
432	w	1,1cm	0	0	1	0	0	0	1	0	0	0	1	0	0	0	0	0	0	0	0	1	0	0	0	0	0	0	0	1	1	1	1	0	0	0	0	LM	0	0	< 0,2mm	0	< 1/mm2	IA
433	m	0,9cm	0	0	1	0	0	0	1	0	0	0	1	0	0	0	0	0	0	0	0	0	0	1	0	0	0	0	0	0	1	1	1	0	0	0	0	SSM	0	0	< 0,2mm	0	< 1/mm2	IA
434	m	1,2cm	0	0	0	1	1	0	0	0	0	1	1	0	0	0	0	0	1	0	0	1	0	0	0	0	0	1	0	0	0	0	0	0	0	0	0	SSM	0	0	< 0,2mm	0	< 1/mm2	IA
435	w	0,5cm	0	0	1	0	0	0	0	0	1	0	1	0	0	0	0	1	0	0	0	0	0	1	0	0	0	0	0	0	0	0	0	0	0	0	0	SSM	0	0	< 0,2mm	0	< 1/mm2	IA
436	m	1,7cm	0	0	1	0	0	0	0	0	1	1	0	0	1	0	0	0	0	0	0	1	0	0	0	0	0	0	0	0	0	0	0	0	0	0	0	SSM	0	0	< 0,2mm	0	< 1/mm2	IA
437	m	0,2cm	0	0	1	0	0	0	1	0	0	0	0	0	0	1	0	0	0	0	0	0	0	1	0	0	0	0	0	0	0	0	1	0	0	0	0	LM	0	0	< 0,2mm	0	< 1/mm2	IA
438	m	1,2cm	0	0	0	0	1	0	1	0	0	0	1	0	0	0	0	0	1	0	0	1	0	0	0	0	0	1	0	0	0	0	0	0	0	0	0	SSM	0	0	< 0,2mm	0	< 1/mm2	IA
439	m	1,1cm	0	0	0	0	1	0	0	0	1	0	1	0	0	0	0	1	1	0	0	1	0	0	0	0	0	0	0	0	0	0	0	0	0	0	0	SSM	0	0	< 0,2mm	0	< 1/mm2	IA
440	w	2,4cm	0	0	0	1	1	0	1	0	0	0	0	0	1	0	0	0	0	0	0	1	0	0	0	0	0	0	0	0	0	0	0	0	0	0	0	SSM	0	0	< 0,2mm	0	< 1/mm2	IA
441	w	1,3cm	0	0	1	0	0	0	1	0	0	0	1	0	0	0	0	0	0	0	0	1	0	0	0	0	0	0	0	0	1	1	0	0	0	0	0	LM	0	0	< 0,2mm	0	< 1/mm2	IA
442	m	1,4cm	0	0	1	0	0	0	1	0	0	0	0	0	0	1	0	0	0	0	0	1	0	0	0	0	0	0	0	0	0	0	1	0	0	0	0	LM	0	0	< 0,2mm	0	< 1/mm2	IA
443	m	0,5cm	0	0	0	1	1	0	0	0	1	0	0	0	1	0	0	0	0	0	0	0	0	1	0	0	0	0	0	1	1	1	1	0	0	0	0	SSM	0	0	< 0,2mm	0	< 1/mm2	IA
444	m	1,1cm	0	0	1	0	0	1	0	0	1	1	1	0	0	0	0	0	0	0	0	1	0	0	0	0	0	1	0	0	0	0	0	0	0	0	0	SSM	0	0	< 0,2mm	0	< 1/mm2	IA
445	m	1,5cm	0	0	0	1	1	0	0	0	1	0	0	0	1	1	0	0	0	0	0	0	0	1	0	0	0	0	0	0	0	0	0	0	0	0	0	SSM	0	0	< 0,2mm	0	< 1/mm2	IA
446	m	0,5cm	0	0	1	0	0	0	1	0	0	0	1	0	0	0	0	0	0	0	0	1	0	0	0	0	0	0	0	0	1	1	1	0	0	0	0	LM	0	0	< 0,2mm	0	< 1/mm2	IA
447	m	1,7cm	0	0	1	0	0	0	1	0	0	0	1	0	0	0	0	0	0	0	0	1	0	0	0	0	0	1	0	0	1	1	1	0	0	0	0	SSM	0	0	< 0,2mm	0	< 1/mm2	IA
448	w	1,0cm	0	0	1	0	0	0	0	0	1	0	1	0	0	0	0	0	1	0	0	1	0	0	0	0	0	1	0	0	0	0	0	0	0	0	0	SSM	0	0	< 0,2mm	0	< 1/mm2	IA
449	m	0,7cm	0	0	1	0	0	0	1	0	0	0	1	0	0	0	0	0	0	0	0	1	0	0	0	0	0	0	0	0	1	1	0	0	0	0	0	LM	0	0	< 0,2mm	0	< 1/mm2	IA
450	w	3,9cm	0	0	1	0	0	0	1	0	0	0	1	0	0	0	0	0	0	0	0	1	0	0	0	0	0	0	0	1	1	1	0	0	0	0	0	LM	0	0	< 0,25mm	0	< 1/mm2	IA
451	m	3,1cm	0	0	1	0	0	0	1	0	0	0	1	0	0	0	0	0	0	0	0	1	0	0	0	0	0	0	0	1	1	1	1	0	0	0	0	LM	0	0	< 0,25mm	0	< 1/mm2	IA
452	w	1,1cm	0	0	1	0	0	0	1	0	0	0	1	0	0	0	0	0	0	0	0	1	0	0	0	0	0	0	0	0	0	0	1	0	0	0	0	LM	0	0	< 0,25mm	0	< 1/mm2	IA
453	w	0,7cm	0	0	0	0	1	0	0	0	1	0	1	0	0	0	0	0	0	0	0	1	0	0	0	0	0	0	0	0	0	0	0	0	0	0	0	LM	0	0	< 0,25mm	0	< 1/mm2	IA
454	m	0,6cm	0	0	0	0	1	0	0	0	1	0	1	0	0	0	0	0	0	0	0	0	0	1	0	0	0	0	0	0	0	0	0	0	0	0	0	SSM	0	0	< 0,5mm	0	< 1/mm2	IA
455	m	1,3cm	0	0	0	0	1	0	1	0	0	0	1	0	0	0	0	0	0	0	0	0	0	1	0	0	0	0	0	0	0	0	0	0	0	0	0	SSM	0	0	< 0,5mm	0	< 1/mm2	IA
456	w	0,7cm	0	0	0	0	1	0	1	0	0	0	1	0	0	0	0	0	0	0	0	0	0	1	0	0	0	0	0	0	0	0	0	0	0	0	0	SSM	0	0	< 0,5mm	0	0	IA
457	w	2,1cm	0	0	1	0	0	0	1	0	0	0	1	0	0	0	0	0	0	0	0	1	0	0	0	0	0	0	0	1	1	1	1	0	0	0	0	LM	0	0	< 0,5mm	0	< 1/mm2	IA
458	m	0,5cm	0	0	0	1	0	0	0	0	1	0	1	0	0	0	0	0	0	0	0	1	0	0	0	0	0	0	0	0	0	0	0	0	0	0	0	SSM	0	0	0,75mm	0	< 1/mm2	IA
459	m	1,6cm	0	0	0	0	1	0	0	0	1	0	1	0	0	0	0	0	0	1	0	0	0	1	0	0	1	0	0	0	0	0	0	0	0	0	0	SSM	0	0	Melanoma in situ	0	0	0	0
460	m	1,0cm	0	0	0	0	1	0	0	0	1	1	1	0	0	0	0	1	0	1	0	1	0	0	0	0	0	0	0	0	0	0	0	0	0	0	0	SSM	0	0	Melanoma in situ	0	0	0	0
461	w	0,5cm	0	0	1	0	0	0	0	0	1	0	1	0	0	0	0	0	0	1	0	1	0	0	0	0	0	0	0	0	0	0	0	0	0	0	0	SSM	0	0	Melanoma in situ	0	0	0	0
462	w	0,5cm	0	0	0	0	1	0	1	0	0	0	1	0	0	0	0	0	0	1	0	1	0	0	0	0	0	0	0	1	1	1	1	0	0	0	0	SSM	0	0	Melanoma in situ	0	0	0	0
463	m	1,2cm	0	0	1	0	0	0	0	0	1	0	0	0	1	1	0	0	0	1	0	0	0	1	0	0	0	0	0	0	0	0	0	0	0	0	0	SSM	0	0	Melanoma in situ	0	0	0	0
464	w	0,8cm	0	0	0	1	1	0	0	0	1	1	1	0	0	0	0	0	0	1	0	1	0	0	0	0	0	0	0	0	0	0	0	0	0	0	0	SSM	0	0	Melanoma in situ	0	0	0	0
465	w	1,6cm	0	0	0	0	1	0	0	0	1	1	0	0	1	0	0	0	0	1	0	0	0	1	0	0	0	0	0	0	0	0	0	0	0	0	0	SSM	0	0	Melanoma in situ	0	0	0	0
466	w	0,9cm	0	0	0	1	1	0	0	0	1	0	0	0	1	0	0	0	0	1	0	1	0	0	0	0	0	0	0	0	0	0	0	0	0	0	0	SSM	0	0	Melanoma in situ	0	0	0	0
467	w	0,7cm	0	0	1	0	0	0	1	0	0	0	1	0	0	0	0	0	0	0	1	1	0	0	0	0	0	0	0	0	1	1	1	0	0	0	0	LM	0	0	Melanoma in situ	0	0	0	0
468	m	1,8cm	0	0	0	0	1	0	1	0	0	0	1	0	0	0	0	0	0	0	1	1	0	0	0	0	0	0	0	0	1	1	1	0	0	0	0	LM	0	0	Melanoma in situ	0	0	0	0
469	w	3,1cm	1	1	0	0	1	0	1	0	0	0	1	0	0	0	1	0	0	0	0	1	0	0	0	0	0	1	0	0	0	0	0	0	0	0	0	LM	0	0	Melanoma in situ	0	0	0	0
470	m	2,2cm	1	0	0	1	1	0	0	0	1	0	1	0	0	0	1	0	1	0	1	1	0	0	0	0	0	0	0	0	0	0	0	0	0	0	0	SSM	0	0	Melanoma in situ	0	0	0	0
471	m	1,4cm	0	0	0	1	1	0	1	0	0	0	1	0	0	0	1	0	0	0	1	1	0	0	0	0	0	1	0	0	0	0	0	0	0	0	0	SSM	0	0	Melanoma in situ	0	0	0	0
472	m	1,3cm	0	0	1	0	0	0	1	0	0	0	1	0	0	0	0	0	0	0	0	1	0	0	0	0	0	0	0	0	0	0	0	0	0	0	0	LM	0	0	Melanoma in situ	0	0	0
473	w	1,0cm	0	0	1	0	0	0	1	0	0	0	1	0	0	0	0	0	0	0	0	1	0	0	0	0	0	0	0	1	0	0	1	0	0	0	0	LM	0	0	Melanoma in situ	0	0	0
474	m	0,7cm	0	0	0	1	1	0	0	0	1	0	0	0	1	1	0	1	0	0	0	1	0	0	0	0	0	0	0	0	0	0	0	0	0	0	0	SSM	0	0	Melanoma in situ	0	0	0
475	w	1,0cm	0	0	1	0	0	0	1	0	0	0	1	0	0	0	0	0	0	0	0	1	0	0	0	0	0	0	0	1	1	1	1	0	0	0	0	LM	0	0	Melanoma in situ	0	0	0
476	w	0,8cm	0	0	1	0	0	0	1	0	0	0	1	0	0	0	0	0	0	0	0	1	0	0	0	0	0	0	0	0	1	1	1	0	0	0	0	LM	0	0	Melanoma in situ	0	0	0
477	w	1,3cm	0	0	1	0	0	0	1	0	0	0	1	0	0	0	0	1	0	0	0	1	0	0	0	0	0	0	0	1	1	1	1	0	0	0	0	LM	0	0	Melanoma in situ	0	0	0
478	w	1,4cm	0	0	1	0	0	0	1	0	0	0	1	0	0	0	0	1	0	0	0	1	0	0	0	0	0	1	0	1	1	1	0	0	0	0	0	LM	0	0	Melanoma in situ	0	0	0
479	m	1,1cm	0	0	0	1	1	0	1	0	0	0	1	0	0	0	0	0	1	0	0	0	0	1	0	0	1	0	0	0	0	0	0	0	0	0	0	SSM	0	0	Melanoma in situ	0	0	0
480	w	1,2cm	0	0	1	0	0	0	1	0	0	0	1	0	0	0	0	0	0	0	0	1	0	0	0	0	0	0	0	0	0	0	1	0	0	0	0	LM	0	0	Melanoma in situ	0	0	0
481	w	0,9cm	0	0	1	0	0	0	0	0	1	0	1	0	0	0	0	0	0	0	0	0	0	1	0	0	0	0	0	0	0	0	0	0	0	0	0	Mucosa	0	0	Melanoma in situ	0	0	0
482	w	3,1cm	0	0	1	0	0	0	1	0	0	0	1	0	0	0	0	0	0	0	0	0	0	1	0	0	0	0	0	0	0	0	1	0	0	0	0	LM	0	0	Melanoma in situ	0	0	0
483	w	1,3cm	0	0	0	0	1	0	1	0	0	0	1	0	0	0	0	0	0	0	0	1	0	0	0	0	0	0	0	1	1	1	1	0	0	0	0	LM	0	0	Melanoma in situ	0	0	0
484	m	1,5cm	0	0	1	0	0	0	1	0	0	0	1	0	0	0	0	0	0	0	0	1	0	0	0	0	0	0	0	1	0	0	1	0	0	0	0	LM	0	0	Melanoma in situ	0	0	0
485	m	0,7cm	0	0	1	0	0	0	1	0	0	0	1	0	0	0	0	0	0	0	0	1	0	0	0	0	0	0	0	0	1	1	1	0	0	0	0	LM	0	0	Melanoma in situ	0	0	0
486	w	1,0cm	0	0	0	1	1	0	0	0	1	1	1	0	0	0	0	0	0	0	0	1	0	0	0	0	0	0	0	0	0	0	0	0	0	0	0	SSM	0	0	Melanoma in situ	0	0	0
487	m	2,0cm	0	0	0	0	1	0	0	0	1	0	1	0	0	0	0	1	1	0	0	1	0	0	0	0	0	0	0	0	0	0	0	0	0	0	0	SSM	0	0	Melanoma in situ	0	0	0
488	w	0,3cm	0	0	0	0	1	0	1	0	0	0	1	0	0	0	0	0	0	0	0	0	0	1	0	0	0	0	0	0	0	0	0	0	0	0	0	SSM	0	0	Melanoma in situ	0	0	0
489	m	1,5cm	0	0	1	0	0	0	1	0	0	0	1	0	0	0	0	0	0	0	0	1	0	0	0	0	0	0	0	1	0	0	1	0	0	0	0	LM	0	0	Melanoma in situ	0	0	0
490	m	0,9cm	0	0	1	0	0	0	1	0	0	0	1	0	0	0	0	0	0	0	0	1	0	0	0	0	0	0	0	0	0	1	1	0	0	0	0	LM	0	0	Melanoma in situ	0	0	0
491	w	1,7cm	0	0	1	0	0	0	1	0	0	0	1	0	0	0	0	0	0	0	0	1	0	0	0	0	0	0	0	0	1	1	1	0	0	0	0	LM	0	0	Melanoma in situ	0	0	0
492	w	0,4cm	0	0	1	0	0	0	1	0	0	0	1	0	0	0	0	0	0	0	0	1	0	0	0	0	0	0	0	1	1	1	1	0	0	0	0	LM	0	0	Melanoma in situ	0	0	0
493	m	0,5cm	0	0	1	0	0	0	1	0	0	0	1	0	0	0	0	0	1	0	0	0	0	1	0	0	0	0	0	0	0	0	0	0	0	0	0	SSM	0	0	Melanoma in situ	0	0	0
494	m	0,8cm	0	0	1	0	0	0	1	0	0	0	1	0	0	0	0	0	0	0	0	1	0	0	0	0	0	0	0	0	0	0	1	0	0	0	0	LM	0	0	Melanoma in situ	0	0	0
495	w	2,5cm	0	0	1	0	0	0	1	0	0	0	1	0	0	0	0	0	1	0	0	1	0	0	0	0	0	0	0	1	1	1	1	0	0	0	0	LM	0	0	Melanoma in situ	0	0	0
496	m	0,5cm	0	0	1	0	0	0	1	0	0	0	1	0	0	0	0	0	0	0	0	1	0	0	0	0	0	0	0	0	0	0	0	1	0	0	1	ALM	0	0	Melanoma in situ	0	0	0
497	m	1,9cm	0	0	1	0	0	0	0	0	1	0	1	0	0	0	0	0	0	0	0	1	0	0	0	0	0	0	0	1	0	0	0	0	0	0	0	LM	0	0	Melanoma in situ	0	0	0
498	w	0,6cm	0	0	1	0	0	0	1	0	0	0	1	0	0	0	0	0	0	0	0	1	0	0	0	0	0	0	0	0	0	0	1	0	0	0	0	LM	0	0	Melanoma in situ	0	0	0
499	w	0,6cm	0	0	1	0	0	0	1	0	0	0	1	0	0	0	0	0	0	0	0	1	0	0	0	0	0	0	0	0	0	0	1	0	0	0	0	LM	0	0	Melanoma in situ	0	0	0
500	w	1,0cm	0	0	1	0	0	0	1	0	0	0	1	0	0	0	0	0	0	0	0	1	0	0	0	0	0	0	0	0	0	0	0	0	0	0	0	LM	0	0	Melanoma in situ	0	0	0
501	w	1,2cm	0	0	1	0	0	0	1	0	0	0	1	0	0	0	0	0	0	0	0	1	0	0	0	0	0	0	0	1	0	0	1	0	0	0	0	LM	0	0	Melanoma in situ	0	0	0
502	w	1,4cm	0	0	1	0	0	0	1	0	0	0	1	0	0	0	0	0	0	0	0	0	0	1	0	0	0	0	0	1	1	1	1	0	0	0	0	LM	0	0	Melanoma in situ	0	0	0
503	m	0,8cm	0	0	1	0	0	0	1	0	0	0	1	0	0	0	0	0	1	0	0	1	0	0	0	0	0	0	0	0	0	0	0	0	0	0	0	SSM	0	0	Melanoma in situ	0	0	0
504	w	2,0cm	0	0	1	0	0	0	1	0	0	0	1	0	0	0	0	0	0	0	0	0	0	1	0	0	0	0	0	0	0	0	0	0	0	0	1	ALM	0	0	Melanoma in situ	0	0	0
505	w	1,8cm	0	0	1	0	0	0	1	0	0	0	1	0	0	0	0	0	0	0	0	1	0	0	0	0	0	0	0	1	1	1	1	0	0	0	0	LM	0	0	Melanoma in situ	0	0	0
506	w	0,5cm	0	0	0	0	1	0	1	0	0	0	0	0	0	1	0	0	0	0	0	0	0	1	0	0	0	0	0	0	0	0	0	0	0	0	0	SSM	0	0	Melanoma in situ	0	0	0
507	w	1,7cm	0	0	1	0	0	0	1	0	0	0	1	0	0	0	0	1	0	0	0	1	0	0	0	0	0	0	0	1	0	0	1	0	0	0	0	LM	0	0	Melanoma in situ	0	0	0
508	w	1,7cm	0	0	1	0	0	0	1	0	0	0	1	0	0	0	0	0	1	0	0	1	0	0	0	0	0	0	0	1	1	1	1	0	0	0	0	LM	0	0	Melanoma in situ	0	0	0
509	w	1,0cm	0	0	1	0	0	1	0	0	1	1	1	0	0	0	0	0	0	0	0	1	0	0	0	0	0	1	0	0	0	0	0	0	0	0	0	SSM	0	0	Melanoma in situ	0	0	0
510	w	1,8cm	0	0	1	0	0	0	1	0	0	0	1	0	0	0	0	1	0	0	0	1	0	0	0	0	0	0	0	0	1	1	1	0	0	0	0	LM	0	0	Melanoma in situ	0	0	0
511	m	3,0cm	0	0	1	0	0	0	1	0	0	0	1	0	0	0	0	0	0	0	0	1	0	0	0	0	0	0	0	0	1	1	1	0	0	0	0	LM	0	0	Melanoma in situ	0	0	0
512	m	0,3cm	0	0	0	1	1	0	1	0	0	0	0	0	1	1	0	0	0	0	0	1	0	0	0	0	0	0	0	0	0	0	0	0	0	0	0	SSM	0	0	Melanoma in situ	0	0	0
513	m	0,4cm	0	0	1	0	0	0	1	0	0	0	1	0	0	0	0	0	0	0	0	1	0	0	0	0	0	0	0	0	1	1	1	0	0	0	0	SSM	0	0	Melanoma in situ	0	0	0
514	w	2,5cm	0	0	1	0	0	0	1	0	0	0	1	0	0	0	0	0	0	0	0	1	0	0	0	0	0	0	0	1	0	0	1	0	0	0	0	LM	0	0	Melanoma in situ	0	0	0
515	w	0,8cm	0	0	1	0	0	0	1	0	0	0	1	0	0	0	0	0	0	0	0	1	0	0	0	0	0	0	0	0	1	1	1	0	0	0	0	LM	0	0	Melanoma in situ	0	0	0
516	w	1,1cm	0	0	1	0	0	0	1	0	0	0	1	0	0	0	0	1	0	0	0	1	0	0	0	0	0	0	0	0	0	1	1	0	0	0	0	LM	0	0	Melanoma in situ	0	0	0
517	w	0,4cm	0	0	1	0	0	0	1	0	0	0	1	0	0	0	0	0	0	0	0	1	0	0	0	0	0	0	0	0	1	1	1	0	0	0	0	LM	0	0	Melanoma in situ	0	0	0
518	w	2,1cm	0	0	1	0	0	0	1	0	0	0	1	0	0	0	0	0	0	0	0	1	0	0	0	0	0	0	0	0	1	1	1	0	0	0	0	LM	0	0	Melanoma in situ	0	0	0
519	m	1,1cm	0	0	1	0	0	0	1	0	0	0	1	0	0	0	0	0	0	0	0	1	0	0	0	0	0	0	0	0	0	0	0	0	0	0	0	LM	0	0	Melanoma in situ	0	0	0
520	w	2,2cm	0	0	1	0	0	0	1	0	0	0	1	0	0	0	0	0	0	0	0	1	0	0	0	0	0	0	0	0	0	0	0	0	0	0	0	LM	0	0	Melanoma in situ	0	0	0
521	m	1,7cm	0	0	1	0	0	0	1	0	0	0	1	0	0	0	0	0	0	0	0	0	0	1	0	0	0	0	0	0	1	1	1	0	0	0	0	LM	0	0	Melanoma in situ	0	0	0
522	m	0,9cm	0	0	0	0	1	0	0	0	1	0	1	0	0	0	0	0	0	0	0	1	0	0	0	0	0	0	0	0	0	0	0	0	0	0	0	SSM	0	0	Melanoma in situ	0	0	0
523	w	0,7cm	0	0	1	0	0	0	1	0	0	0	1	0	0	0	0	0	0	0	0	1	0	0	0	0	0	0	0	0	1	1	1	0	0	0	0	LM	0	0	Melanoma in situ	0	0	0
524	w	1,0cm	0	0	1	0	0	0	0	0	1	0	1	0	0	0	0	0	0	0	0	0	0	1	0	0	0	0	0	1	0	0	0	0	0	0	0	LM	0	0	Melanoma in situ	0	0	0
525	m	1,1cm	0	0	1	0	0	0	1	0	0	0	1	0	0	0	0	0	0	0	0	1	0	0	0	0	0	0	0	1	0	0	1	0	0	0	0	LM	0	0	Melanoma in situ	0	0	0
526	w	0,3cm	0	0	0	0	1	0	1	0	0	0	0	0	1	0	0	0	0	0	0	1	0	0	0	0	0	0	0	0	0	0	0	0	0	0	0	SSM	0	0	Melanoma in situ	0	0	0
527	w	1,5cm	0	0	1	0	0	0	1	0	0	0	1	0	0	0	0	0	0	0	0	1	0	0	0	0	0	0	0	0	0	1	1	0	0	0	0	LM	0	0	Melanoma in situ	0	0	0
528	w	1,0cm	0	0	0	0	1	0	0	0	1	1	1	0	0	0	0	0	0	0	0	1	0	0	0	0	0	0	0	0	0	0	0	0	0	0	0	LM	0	0	Melanoma in situ	0	0	0
529	w	1,0cm	0	0	1	0	0	0	1	0	0	0	1	0	0	0	0	0	0	0	0	1	0	0	0	0	0	0	0	0	1	1	1	0	0	0	0	LM	0	0	Melanoma in situ	0	0	0
530	w	0,8cm	0	0	1	0	0	0	1	0	0	0	1	0	0	0	0	0	0	0	0	1	0	0	0	0	0	0	0	0	1	1	0	0	0	0	0	LM	0	0	Melanoma in situ	0	0	0
531	w	0,7cm	0	0	1	0	0	0	1	0	0	0	0	0	1	1	0	0	0	0	0	0	0	1	1	0	0	0	0	1	0	0	1	0	0	0	0	LM	0	0	Melanoma in situ	0	0	0
532	w	0,2cm	0	0	1	0	0	0	1	0	0	0	0	0	0	1	0	0	0	0	0	0	0	1	0	0	0	0	0	0	0	0	0	0	0	0	0	SSM	0	0	Melanoma in situ	0	0	0
533	w	0,6cm	0	0	0	0	1	0	1	0	0	0	0	0	1	0	0	0	0	0	0	0	0	1	0	0	0	0	0	0	0	0	0	0	0	0	0	SSM	0	0	Melanoma in situ	0	0	0
534	w	1,1cm	0	0	1	0	0	0	1	0	0	0	1	0	0	0	0	0	0	0	0	1	0	0	0	0	0	0	0	1	0	0	1	0	0	0	0	LM	0	0	Melanoma in situ	0	0	0
535	m	1,2cm	0	0	1	0	0	0	1	0	0	0	1	0	0	0	0	0	0	0	0	1	0	0	0	0	0	0	0	0	1	1	1	0	0	0	0	LM	0	0	Melanoma in situ	0	0	0
536	m	1,5cm	0	0	1	0	0	0	0	0	1	0	1	0	0	0	0	0	0	0	0	0	0	1	0	0	0	0	0	0	0	0	0	0	0	0	0	SSM	0	0	Melanoma in situ	0	0	0
537	m	0,6cm	0	0	1	0	0	0	1	0	0	0	1	0	0	0	0	0	0	0	0	1	0	0	0	0	0	0	0	1	1	1	1	0	0	0	0	LM	0	0	Melanoma in situ	0	0	0
538	m	1,8cm	0	0	1	0	0	0	1	0	0	0	1	0	0	0	0	0	0	0	0	0	0	1	0	0	0	0	0	1	0	0	1	0	0	0	0	LM	0	0	Melanoma in situ	0	0	0
539	w	1,1cm	0	0	1	0	0	0	1	0	0	0	1	0	0	0	0	0	0	0	0	1	0	0	0	0	0	0	0	0	0	0	1	0	0	0	0	SSM	0	0	Melanoma in situ	0	0	0
540	w	1,3cm	0	0	0	1	1	0	1	0	0	0	1	0	0	0	0	0	0	0	0	1	0	0	0	0	0	0	0	0	0	0	0	0	0	0	0	SSM	0	0	Melanoma in situ	0	0	0
541	m	1,2cm	0	0	1	0	0	0	1	0	0	0	1	0	0	0	0	0	0	0	0	1	0	0	0	0	0	0	0	0	0	0	1	0	0	0	0	LM	0	0	Melanoma in situ	0	0	0
542	w	2,1cm	0	0	1	0	0	0	1	0	0	0	1	0	0	0	0	0	0	0	0	1	0	0	0	0	0	0	0	0	0	0	1	0	0	0	0	LM	0	0	Melanoma in situ	0	0	0
543	m	1,3cm	0	0	1	0	0	0	1	0	0	0	1	0	0	0	0	0	0	0	0	0	0	1	0	0	0	0	0	0	1	1	1	0	0	0	0	LM	0	0	Melanoma in situ	0	0	0
544	w	0,6cm	0	0	1	0	0	0	1	0	0	0	1	0	0	0	0	0	0	0	0	1	0	0	0	0	0	0	0	0	0	0	1	0	0	0	0	LM	0	0	Melanoma in situ	0	0	0
545	w	2,5cm	0	0	0	0	1	0	1	0	0	0	1	0	0	0	0	0	0	0	0	1	0	0	0	0	0	0	0	0	0	0	0	0	0	0	0	SSM	0	0	Melanoma in situ	0	0	0
546	w	1,3cm	0	0	1	0	0	0	1	0	0	0	1	0	0	0	0	0	0	0	0	1	0	0	0	0	0	0	0	1	1	1	1	0	0	0	0	LM	0	0	Melanoma in situ	0	0	0
547	m	2,2cm	0	0	1	0	0	0	1	0	0	0	1	0	0	0	0	0	0	0	0	1	0	0	0	0	0	0	0	0	1	1	1	0	0	0	0	LM	0	0	Melanoma in situ	0	0	0
548	m	1,6cm	0	0	1	0	0	0	1	0	0	0	1	0	0	0	0	0	0	0	0	1	0	0	0	0	0	0	0	0	1	1	1	0	0	0	0	LM	0	0	Melanoma in situ	0	0	00:00:00
549	w	1,0cm	0	0	0	0	1	0	1	0	0	0	1	0	0	0	0	0	0	0	0	0	0	1	0	0	0	0	0	0	1	1	0	0	0	0	0	LM	0	0	Melanoma in situ	0	0	0
550	w	0,8cm	0	0	1	0	0	0	1	0	0	0	1	0	0	0	0	0	0	0	0	1	0	0	0	0	0	0	0	1	0	1	1	0	0	0	0	LM	0	0	Melanoma in situ	0	0	0
551	m	1,5cm	0	0	0	1	1	0	0	0	1	0	1	0	0	0	0	0	0	0	0	1	0	0	0	0	0	1	0	0	0	0	0	0	0	0	0	SSM	0	0	Melanoma in situ	0	0	0
552	m	2,5cm	0	0	1	0	0	0	1	0	0	0	1	0	0	0	0	0	0	0	0	1	0	0	0	0	0	0	0	0	0	0	1	0	0	0	0	LM	0	0	Melanoma in situ	0	0	0
553	m	1,1cm	0	0	1	0	0	0	0	0	1	0	1	0	0	0	0	0	0	0	0	1	0	0	0	0	0	0	0	0	0	0	0	0	0	0	0	ALM	0	0	Melanoma in situ	0	0	0
554	m	1,1cm	0	0	1	0	0	1	1	0	0	0	1	0	0	0	0	0	1	0	0	1	0	0	0	0	0	0	0	0	1	1	1	0	0	0	0	LM	0	0	LM	0	0	0
555	w	2,5cm	1	1	0	1	1	0	0	0	1	0	1	0	0	0	1	0	0	0	0	0	0	1	0	0	0	1	1	0	0	0	0	0	0	0	0	SSM	0	0	keine Angabe	0	0
556	m	1,3cm	0	0	0	0	1	0	0	0	1	0	1	0	0	0	1	1	0	0	0	0	0	1	0	0	0	0	0	0	0	0	0	0	0	0	0	LM	0	0	keine Angabe	0	< 1/mm2
557	m	0,6cm	0	0	0	0	1	0	1	0	0	0	1	0	0	0	1	0	0	1	0	0	0	1	0	0	0	0	1	0	0	0	0	0	0	0	0	SSM	0	0	Nicht möglich	0	< 1/mm2
558	w	3,0cm	1	1	1	0	0	0	1	0	0	0	1	0	0	0	1	0	0	0	1	1	0	0	0	0	0	1	0	0	0	0	0	0	0	0	0	ALM	0	0	Nicht angegben	0	0
																																						LM = 152
																																						LMM = 5
																																						SSM =323
																																						NM = 40
																																						ALM = 33
																																						Schleimhaut = 5
																																						Desmoplastisch = 1
																																						320
																																						0
